# Supplementary material for: PLK4 promotes centriole duplication by phosphorylating STIL to link the procentriole cartwheel to the microtubule wall
Source: eLife. 2019 May 22;8:e46054. doi: 10.7554/eLife.46054 (PMC6570480; doi:10.7554/eLife.46054)
Supplement: Figure 2—source data 1. [file elife-46054-fig2-data1.xlsx]

## Sheet: Figure 2 source data
Figure 2B - source data
										Statistical Test Used	n	Comparison	p-value
	Myc-GFP-STIL:	+	+	+	S428A	S428A			Figure 2B	One sample t-test	3	STILWT + CPAP vs. STILWT + CPAP + Plk4WT	0.0051
	Flag-CPAP:	+	+	+	+	+				One sample t-test	3	STILWT + CPAP + Plk4WT vs. STILS428A + CPAP + Plk4WT	0.0063
	PLK4∆24-mCherry:		KD	WT	KD	WT			Figure 2C	One sample t-test	3	STILWT + TCP domain +Plk4, no ATP vs. STILWT + TCP domain +Plk4, with ATP	0.0138
	Trial 1:	1.54442	5.96502	100	10.6243	3.07556				One sample t-test	3	STILWT + TCP domain +Plk4, with ATP vs. STILS428A + TCP domain +Plk4, with ATP	0.0066
	Trial 2:	14.4155	18.1997	100	38.3738	26.5558			Figure 2F	One sample t-test	3	Ana2WT + DmSAS4 vs. Ana2WT + DmSAS4 + DmPlk4SBM	0.0002
	Trial 3:	23.0476	10.591	100	5.03908	14.7511				One sample t-test	3	Ana2WT + DmSAS4 + DmPlk4SBM vs. Ana2S38A + DmSAS4 + DmPlk4SBM	0.0075
Figure 2C - source data
	GST-STIL:	WT	WT	S428A	S428A
	Flag-CPAP TCP:	+	+	+	+
	ATP:	-	+	-	+
	Trial 1:	56.4093	100	26.4512	37.6541
	Trial 2:	35.4058	100	41.2445	44.7835
	Trial 3:	36.8523	100	15.3443	26.9886
Figure 2F - source data
	Myc-GFP-Ana2:	+	+	S38A
	Flag-DmSAS4:	+	+	+
	DmPLK4SBM-mCherry:		+	+
	Trial 1:	14.3293	100	29.9629
	Trial 2:	13.0488	100	8.09833
	Trial 3:	17.2785	100	7.42646
