# Supplementary material for: PLK4 promotes centriole duplication by phosphorylating STIL to link the procentriole cartwheel to the microtubule wall
Source: eLife. 2019 May 22;8:e46054. doi: 10.7554/eLife.46054 (PMC6570480; doi:10.7554/eLife.46054)
Supplement: Figure 3—source data 1. [file elife-46054-fig3-data1.xlsx]

## Sheet: Figure 3
Figure 3A - source data
		Percent of mitotic cells containing:
		0 centrioles			1 centriole			2 centrioles			3 centrioles			4 centrioles			5+ centrioles
STIL siRNA	Myc-GFP-STIL Transgene	Trial 1	Trial 2	Trial 3	Trial 1	Trial 2	Trial 3	Trial 1	Trial 2	Trial 3	Trial 1	Trial 2	Trial 3	Trial 1	Trial 2	Trial 3	Trial 1	Trial 2	Trial 3
-	-	0	0	0	3.33333	0	0	13.3333	13.3333	10	6.66667	10	16.6667	76.6667	76.6667	70	0	0	3.33333
+	-	3.33333	0	3.33333	53.3333	70	73.3333	43.3333	30	23.3333	0	0	0	0	0	0	0	0	0
+	WT	0	3.33333	6.66667	3.33333	6.66667	6.66667	13.3333	16.6667	20	16.6667	3.33333	3.33333	63.3333	56.6667	63.3333	3.33333	13.3333	0
+	S428A	6.66667	0	0	6.66667	25.8065	26.6667	20	61.2903	36.6667	23.3333	6.45161	20	43.3333	6.45161	16.6667	0	0	0
+	S1116A	0	3.33333	13.3333	6.66667	26.6667	16.6667	43.3333	56.6667	43.3333	30	3.33333	20	20	10	6.66667	0	0	0
+	PRP	0	0	3.33333	30	33.3333	6.66667	23.3333	53.3333	40	23.3333	10	20	23.3333	0	30	0	3.33333	0
+	PRP_28A	10	0	3.33333	26.6667	26.6667	30	43.3333	30	40	3.33333	20	13.3333	16.6667	23.3333	13.3333	0	0	0
+	28A_16A	16.6667	6.66667	3.33333	36.6667	56.6667	53.3333	33.3333	33.3333	36.6667	13.3333	3.33333	0	0	0	6.66667	0	0	0
+	PRP_16A	10	3.33333	10	43.3333	73.3333	50	43.3333	16.6667	26.6667	0	0	6.66667	3.33333	6.66667	6.66667	0	0	0
+	PRP_28A_16A	3.33333	0	10	36.6667	70	70	60	26.6667	13.3333	0	3.33333	3.33333	0	0	3.33333	0	0	0
																					Statistical Test Used	n	Comparison	p-value
																				Figure 3A	Unpaired t-test	3,3	control vs knockdown	<0.0001
																					Unpaired t-test	3,3	control vs WT addback	0.1012
																					Unpaired t-test	3,3	STILWT Addback vs. STILS428A Addback	0.0148
Figure 3C- source data																					Unpaired t-test	3,3	STILWT Addback vs. STILS1116A Addback	0.0003
																					Unpaired t-test	3,3	STILWT Addback vs. STILPRP Addback	0.0042
		Myc-GFP-STIL Transgene:	WT	S428A	S1116A	PRP_AAA	PRP/28A	28A/16A	PRP/16A	PRP/28A/16A											Unpaired t-test	3,3	STILS428A Addback vs. STILPRP Addback	0.8223
		Trial 1:	100	74.2571		66.3281	67.172														Unpaired t-test	3,3	STILS428A Addback vs. STILPRP/28A Addback	0.7204
		Trial 2:	100	64.671	48.0874	58.8824	50.0225														Unpaired t-test	3,3	STILWT Addback vs. STIL28A/16A Addback	<0.0001
		Trial 3:	100	74.3005	39.4516	57.5566	57.0056														Unpaired t-test	3,3	STILWT Addback vs. STILPRP/16A Addback	<0.0001
		Trial 4:	100	68.3271	66.7153	52.9728	60.525	26.3791	24.1497	27.8836											Unpaired t-test	3,3	STILWT Addback vs. STILPRP/28A/16A Addback	<0.0001
		Trial 5:	100	63.7794	40.3151	45.4015	42.0026	15.1468	10.0923	17.5333										Figure 3C	One sample t-test	6	STILWT vs STILS428A	0.0006
		Trial 6:	100	87.8845	61.1955	60.4356	47.4934	17.0485	9.20724	9.55496											One sample t-test	5	STILWT vs STILS1116A	0.0009
																					One sample t-test	6	STILWT vs STILPRP	<0.0001
																					One sample t-test	6	STILWT vs STILPRP/28A	<0.0001
																					One sample t-test	3	STILWT vs STIL28A/16A	0.0019
																					One sample t-test	3	STILWT vs STILPRP/16A	0.0032
Figure 3E - source data																					One sample t-test	3	STILWT vs STILPRP/28A/16A	0.0042
																				Figure 3E	One sample t-test	3	STILWT + CPAP vs. STILWT + CPAP + Plk4WT	0.0309
																					One sample t-test	3	STILWT + CPAP + Plk4WT vs. STILS428A + CPAP + Plk4WT	0.0023
	Myc-GFP-STIL:	WT	WT	WT	S428A	S428A	PRP	PRP	PRP/28A	PRP/28A											One sample t-test	3	STILWT + CPAP + Plk4WT vs. STILPRP + CPAP + Plk4WT	0.0001
	Flag-CPAP:	+	+	+	+	+	+	+	+	+											One sample t-test	3	STILWT + CPAP + Plk4WT vs. STILPRP/28A + CPAP + Plk4WT	0.0001
	PLK4∆24-mCherry:		KD	WT	KD	WT	KD	WT	KD	WT
	Trial 1:	5.78925	9.41001	100	25.1389	0.224533	0.0139072	1.22341	-0.410848	-0.589545
	Trial 2:	47.2015	22.8583	100	11.5911	15.6072	1.50294	4.39196	5.79951	3.1238
	Trial 3:	0.384639	29.0625	100	19.9213	6.3197	0.729724	0.987394	0.708347	0.0148296
