# Supplementary material for: PLK4 promotes centriole duplication by phosphorylating STIL to link the procentriole cartwheel to the microtubule wall
Source: eLife. 2019 May 22;8:e46054. doi: 10.7554/eLife.46054 (PMC6570480; doi:10.7554/eLife.46054)
Supplement: Figure 3—source data 2. [file elife-46054-fig3-data2.xlsx]

## Sheet: Figure 3-Supplement 4
Figure 3 - Supplement 4B - source data
		WT	S428A	PRP	WT + centrinone				Statistical Test Used	n	Comparison	p-value
	Trial 1:	100	103.333	103.011	4.85278			Figure 3-S4B	One sample t-test	3	STILWT vs STILS428A	0.0781
	Trial 2:	100	104.01	95.2824	7.64202				One sample t-test	3	STILWT vs STILPRP	0.5984
	Trial 3:	100	101.201	97.4204	3.53472				One sample t-test	3	STILWT vs STILWT + centrinone	0.0002
