# Supplementary material for: PLK4 promotes centriole duplication by phosphorylating STIL to link the procentriole cartwheel to the microtubule wall
Source: eLife. 2019 May 22;8:e46054. doi: 10.7554/eLife.46054 (PMC6570480; doi:10.7554/eLife.46054)
Supplement: Figure 4—source data 1. [file elife-46054-fig4-data1.xlsx]

## Sheet: Figure 4
Figure 4A - source data
	WT data																													Statistical Test Used	n	Comparison	p-value
	Timepoint	Trace 1	Trace 2	Trace 3	Trace 4	Trace 5	Trace 6	Trace 7	Trace 8	Trace 9	Trace 10	Trace 11	Trace 12	Trace 13	Trace 14	Trace 15	Trace 16	Trace 17	Trace 18	Trace 19	Trace 20	Trace 21	Trace 22	Trace 23	Trace 24				Figure 4A	Unpaired t-test	24, 26	STILWT vs STILS428A	0.0001
	-20	100	100	100	100	100	100	100	100	100	100	100	100	100	100	100	100	100	100	100	100	100	100	100	100					Unpaired t-test	24, 19	STILWT vs STILS1116A	0.0003
photobleach->	0	0	0	0	0	0	0	0	0	0	0	0	0	0	0	0	0	0	0	0	0	0	0	0	0				Figure 4B	Unpaired t-test	15, 17	STILWT background vs STILS428A background	0.0157
	20	-25.6497	17.9041	30.63	39.3873	13.6678	22.2391	-2.78603	2.87482	7.04372	55.3482	22.2972	11.2152	9.7209	23.9778	44.581	3.18402	10.3834	20.6493	-1.83712	17.7293	28.5888	13.0837	14.1848	13.1857					Unpaired t-test	15,22	STILWT background vs STILS1116A background	0.3766
	40	-4.02776	15.9594	45.4762	42.2925	22.7605	42.0585	20.9669	24.5971	19.9861	55.9813	24.6768	8.88754	12.5119	28.6957	67.2118	-8.48528	-2.9819	8.53739	10.3618	20.5428	21.2471	28.5246	19.2259	15.0429
	60	26.0172	28.4938	44.0629	51.369	32.5129	26.8648	16.6957	13.8842	19.1707	-16.0613	24.9329	22.4909	27.2831	19.459	70.5637	0.190497	-4.46219	7.55356	-2.03876	17.9633	34.6299	27.3076	3.56465	22.2373
	80	18.1385	36.446	35.1605	52.6983	30.1864	35.3647	12.0762	25.5898	7.73768	97.9673	34.2452	40.0242	26.6376	24.4705	71.163	-8.50161	34.7923	10.986	12.9495	23.058	24.6748	33.8819	-8.87998	12.3033
	100	30.562	32.8006	52.252	67.1538	35.7636	21.2877	34.0776	-4.38314	26.5788	12.6624	34.1265	20.7376	27.1502	33.4871	43.3621	9.24182	27.1885	17.2715	5.46656	22.4906	23.9334	29.5435	20.8606	40.5442
	120	3.11607	32.3203	18.6105	54.2918	32.3311	27.7747	22.9438	-9.17881	2.34212	63.6788	38.6921	35.7316	25.1566	16.8903	40.4368	3.59223	8.95634	17.8509	12.7478	26.7431	31.2386	27.7281	11.2424	47.9423
	140	31.1607	35.2177	41.8703	52.4078	30.8096	22.4183	15.0569	28.1552	0.832755	78.9737	48.654	47.1282	20.8848	11.0925	86.2875	-3.26022	30.2769	23.7866	2.31881	27.8194	41.9108	34.0153	3.33263	54.5382
	160	68.3903	29.0213	53.8106	53.429	35.2963	37.8051	6.9241	16.8106	9.38584	101.633	53.4445	46.977	21.8151	30.7507	36.9121	-5.66048	16.6028	15.7411	5.17531	39.4478	47.6237	36.2552	30.5421	49.855
	180	39.7197	36.3751	58.0901	55.7531	33.001	36.0678	16.8186	-0.99265	25.1908	72.7091	51.3522	76.9952	30.169	36.7373	55.3174	-0.91439	38.541	34.3572	32.8218	31.7618	33.6453	41.7863	39.2744	50.5584
	200	85.6171	33.6037	28.3318	56.0613	28.6857	26.1409	24.7465	14.9929	25.0867	124.525	40.2223	62.1826	43.0985	20.0252	65.4241	2.26419	31.4164	5.67337	10.5298	37.3889	28.212	38.4911	36.5324	64.6079
	220	50.3742	31.6668	11.9931	50.9376	39.1702	35.9989	16.624	-11.0481	19.2228	27.3242	46.7241	48.3978	40.4974	64.7201	55.2768	2.78125	27.8168	24.0053	7.02364	41.4307	72.4687	46.444	34.2544	50.5584
	240	36.1954	39.7606	55.3031	58.1125	29.9579	30.222	31.2814	0.966869	10.8432	13.0956	56.2988	78.2346	43.0795	18.1694	82.3667	10.7876	23.3653	19.4032	25.4397	33.7915	57.5909	44.2647	2.08817	53.8286
	260	52.32	35.1311	34.3548	61.9949	28.182	36.0334	32.6846	11.3575	24.9133	58.6471	53.382	71.8561	28.3273	31.8096	45.3225	9.35068	20.4366	19.4687	2.11717	30.6972	49.7994	51.1462	37.4288	57.8886
	280	68.4855	56.2712	34.6586	61.6251	36.9216	50.0069	35.7574	19.8144	18.4767	85.5715	53.9754	57.5574	35.6939	24.1036	32.4429	7.23344	22.2897	23.8631	13.6216	23.678	39.7472	47.3295	24.478	40.4517
	300	72.3364	63.4202	21.7012	53.1121	40.941	65.6142	46.3177	18.9635	12.4566	43.2856	56.1551	67.9262	33.1688	49.329	-2.48857	15.9038	30.3514	21.7206	15.7612	35.5229	40.5373	47.754	28.8019	42.0189
	320	66.2811	44.7524	31.7924	69.8829	37.0618	38.3703	46.4099	7.51579	28.1575	8.36388	60.1961	43.0774	55.3826	44.307	25.16	16.1487	21.8211	24.7486	14.3497	36.9736	68.7614	61.4927	38.0299	49.5403
	340	54.7149	52.9565	42.61	47.6626	40.432	56.4594	44.3204	7.78651	11.7974	55.948	57.8165	52.5695	25.6313	45.6804	38.2326	23.7033	13.7487	7.7066	10.1154	44.9228	53.8106	40.7512	38.2092	51.0273
	S428A data
	Timepoint	Trace 1	Trace 2	Trace 3	Trace 4	Trace 5	Trace 6	Trace 7	Trace 8	Trace 9	Trace 10	Trace 11	Trace 12	Trace 13	Trace 14	Trace 15	Trace 16	Trace 17	Trace 18	Trace 19	Trace 20	Trace 21	Trace 22	Trace 23	Trace 24	Trace 25	Trace 26
	-20	100	100	100	100	100	100	100	100	100	100	100	100	100	100	100	100	100	100	100	100	100	100	100	100	100	100
photobleach->	0	0	0	0	0	0	0	0	0	0	0	0	0	0	0	0	0	0	0	0	0	0	0	0	0	0	0
	20	30.2739	20.1619	18.8338	24.6798	13.2346	20.6539	19.2746	5.41602	45.0962	-1.39082	4.6194	-37.4679	-13.2419	3.89572	11.7079	15.2998	19.3882	14.446	1.62273	9.79642	20.1895	-6.21312	9.86454	7.80239	11.82	16.6414
	40	25.853	18.5431	37.2308	36.0938	9.39421	36.64	22.1867	9.09561	31.1591	32.2392	0.403753	5.83333	7.08183	-14.3234	7.59192	22.886	49.6013	19.6554	13.4544	15.8025	20.3895	-9.042	6.64542	28.1023	26.364	13.1353
	60	51.1052	44.052	48.7505	38.162	8.68864	32.16	38.344	14.8527	45.2526	36.8846	-11.2219	-53.8141	30.5531	7.89397	17.3547	3.23628	56.308	35.6642	19.245	39.9843	20.1158	-4.40819	5.30677	22.8779	33.5556	21.2585
	80	81.1149	35.1116	29.165	38.4043	41.0241	47.2209	33.858	14.1602	73.8151	14.0751	-7.45755	-41.25	51.7311	10.7206	34.5213	41.3061	86.3512	30.0541	28.0362	31.0314	19.4526	4.00903	4.41434	21.3978	42.2459	20.546
	100	92.1192	13.3799	46.0077	30.296	8.79952	23.7565	34.8008	12.6718	61.6143	26.3143	-4.58378	0.352564	33.6331	-12.0533	17.3422	25.9715	63.8123	25.2454	29.2091	21.2912	21.821	2.70739	14.0239	24.6912	24.6806	26.6093
	120	74.9399	28.6853	54.0837	15.4725	9.17246	53.3565	27.6612	16.4444	80.9166	92.0167	-2.22064	15.9615	36.5108	-3.96895	20.266	9.43046	46.006	27.7499	32.409	34.8217	31.4842	60.1007	25.3227	18.1337	27.2318	19.1069
	140	58.938	12.3988	46.8813	34.9515	17.0547	48.0139	39.9483	-5.67442	91.2091	101.752	-15.2476	25.9295	37.7248	15.5097	9.43657	37.5827	84.3378	70.1463	35.3812	49.1621	32.0316	35.5953	23.6175	9.41972	26.6332	19.3856
	160	81.9077	17.3289	48.4457	29.8287	42.4151	63.9861	51.9085	22.4599	85.4215	101.141	-5.90191	-10.9936	55.8678	26.0252	23.9804	23.002	83.122	43.2178	29.38	53.9534	38.5368	32.4887	57.2749	16.3301	23.8971	29.7944
	180	104.421	11.8715	43.6103	60.6871	25.4611	54.9426	47.1031	6.89406	66.9482	122.17	-22.8001	43.109	21.7401	31.4148	27.7952	58.9259	107.36	50.1302	47.2641	46.4402	37.3263	44.1513	59.4582	7.44952	25.0181	27.1525
	200	77.1024	31.8617	49.1975	71.1232	32.3254	80.487	43.8945	27.907	72.7358	156.495	-1.04501	-9.39103	55.7329	25.5858	41.0716	48.2311	75.6047	50.9317	31.3557	38.2072	34.8632	47.6918	42.1833	37.9043	28.4211	27.3253
	220	77.7271	30.4758	49.8578	61.6303	17.5688	77.607	44.191	18.8837	75.8486	165.424	-19.772	36.6667	73.0216	7.7768	14.6317	32.3512	64.9889	51.2723	38.2338	57.2377	43.8105	35.873	44.6056	24.8089	26.4845	33.4768
	240	64.9207	14.4469	48.3543	90.9398	27.7795	62.6991	66.3017	12.9923	70.1549	144.673	-9.45256	32.8526	97.8642	26.6989	32.25	23.8719	66.7538	88.6395	56.4027	39.4894	42.221	67.3204	48.6534	52.0388	29.7067	19.4773
	260	65.9539	42.9728	55.2214	75.5711	36.6495	57.3009	57.6566	24.4754	90.4114	144.923	8.6213	35.609	57.3741	-2.22613	41.6991	50.7482	105.321	56.3214	49.9459	54.4596	51.5053	35.1614	51.3147	18.2415	21.6874	25.9603
	280	35.4157	-5.70272	47.2775	61.8293	64.5197	73.8365	68.4763	36.3721	74.4877	170.793	-17.6464	77.9808	94.9416	32.9526	40.3187	36.6895	96.4832	46.9445	49.3765	49.9606	69.4947	63.1031	74.9641	26.9457	19.6505	24.0591
	300	-5.81451	26.5882	62.566	78.297	27.5073	73.3635	55.4897	29.5607	77.6631	158.887	-0.45125	19.0705	98.3363	20.0644	29.9912	25.6931	100.013	35.4238	52.9238	54.1896	45.2737	49.8438	59.4422	30.7685	32.6396	34.7783
	320	20.4469	5.02821	59.7724	90.6975	38.1816	72.2365	65.7619	26.0879	62.2712	87.9833	-6.53129	51.4423	113.579	52.9877	24.8839	40.6913	119.637	38.91	54.9052	47.6774	36.8737	66.7824	43.9522	26.8477	21.8883	36.3938
	340	48.3181	-7.73853	64.2625	93.657	44.3504	63.033	63.0246	34.4289	77.5692	175.132	-9.83256	150.609	83.7905	24.9561	22.2613	46.7463	67.6036	57.4835	52.6675	55.4268	43.2526	66.6435	39.6016	39.5609	41.3419	33.4803
	S1116A data
	Timepoint	Trace 1	Trace 2	Trace 3	Trace 4	Trace 5	Trace 6	Trace 7	Trace 8	Trace 9	Trace 10	Trace 11	Trace 12	Trace 13	Trace 14	Trace 15	Trace 16	Trace 17	Trace 18	Trace 19
	-20	100	100	100	100	100	100	100	100	100	100	100	100	100	100	100	100	100	100	100
photobleach->	0	0	0	0	0	0	0	0	0	0	0	0	0	0	0	0	0	0	0	0
	20	59.6568	-9.21356	33.5209	57.8947	45.9494	107.403	36.0857	-20.7783	70.6916	28.0346	36.7439	5.28629	-6.61541	14.3801	4.63881	4.58343	42.7735	-16.1636	-10.7859
	40	52.8246	66.2718	34.7632	66.9445	109.578	73.7705	62.7879	67.6604	4.85288	16.5946	-5.53619	5.92373	31.9237	13.92	30.6185	121.628	46.0922	-22.999	54.3019
	60	41.1959	29.4176	45.0656	67.778	84.4304	198.942	51.7852	38.6436	21.0928	16.844	31.1667	-28.5746	7.52843	8.0453	40.864	140.941	76.5803	-5.41383	15.9837
	80	75.1652	40.1119	69.5382	50.2262	-26.4557	228.08	37.6446	68.5025	22.1628	21.7492	66.4548	-26.4644	19.8142	9.20137	55.229	89.186	62.3292	-12.6777	-3.58347
	100	53.059	105.824	47.9489	59.7285	44.3882	282.813	61.0379	54.3924	16.3928	33.0396	104.101	-8.61633	-0.57665	17.3646	30.4179	121.079	84.1467	-3.97274	38.2828
	120	39.1921	57.8151	32.6067	77.8757	17.0464	219.778	78.8394	59.604	59.8013	-1.3136	85.852	-12.0123	15.9699	41.5005	30.5359	196.706	60.6328	5.00487	34.2913
	140	59.7207	121.323	36.2752	58.3234	6.4557	259.387	62.0336	74.5335	60.9477	6.13568	78.8599	11.2869	-11.3087	11.5371	23.5482	144.283	55.2743	21.2658	39.56
	160	52.2916	75.8473	50.7267	69.5165	30.8439	171.655	58.0207	76.3314	50.5159	-6.11906	59.9959	31.7727	10.1394	52.6837	39.1171	143.853	68.9128	32.4051	53.9294
	180	45.0011	58.1112	57.173	39.6047	-68.3544	237.123	60.4646	150.25	19.7172	-16.2787	81.0129	-0.36268	12.7983	78.8722	27.4788	119.862	84.1737	22.9601	83.9808
	200	77.6594	130.47	32.4894	93.9509	-11.1392	256.108	68.7921	115.703	62.5907	10.6086	87.0822	12.7816	27.7591	114.946	21.8721	113.249	78.8287	5.10224	81.515
	220	79.8444	59.3616	47.1753	35.7942	24.6835	164.357	80.9213	146.45	58.7314	23.5783	48.0828	13.2102	29.2808	88.4157	36.7328	153.02	100.841	27.887	94.2168
	240	68.3223	54.4587	56.4346	77.9233	14.2616	137.758	73.7906	203.96	86.1674	13.2857	81.9766	12.9355	21.9606	99.0327	26.263	178.706	99.7105	70.6719	83.4841
	260	77.638	126.884	32.2902	25.2917	51.3924	143.522	76.2949	177.97	68.1697	-21.0176	86.7336	17.5734	29.7613	74.5311	-7.36544	98.0902	99.899	18.111	33.4575
	280	71.0403	115.466	38.2794	79.0664	3.33333	119.196	76.667	139.167	75.2006	0.69837	91.2446	5.33026	26.766	69.7063	40.8168	168.131	70.4275	43.7196	63.9347
	300	87.7958	97.6308	44.2569	78.9236	95.2321	116.605	46.666	27.1962	93.3894	-15.2644	136.088	21.376	34.0702	79.3205	26.5581	150.418	88.4551	32.2103	92.6911
	320	87.0177	166.963	27.8481	83.8295	7.72152	57.2713	66.6197	46.8366	61.7883	3.12604	144.946	25.6182	29.1687	95.4111	45.5028	143.519	105.089	88.3155	46.3544
	340	55.9156	125.206	45.3586	100.286	133.966	85.8805	54.4705	76.3314	36.9125	-38.0446	116.711	42.4003	50.008	72.2425	52.9863	81.2843	77.7987	59.5326	111.3
	non-bleach data
	Timepoint	Trace 1	Trace 2	Trace 3	Trace 4	Trace 5	Trace 6	Trace 7	Trace 8	Trace 9	Trace 10
	-20	100	100	100	100	100	100	100	100	100	100
	0	92.6096	100.328	110.993	111.181	101.275	107.697	99.7435	93.2172	97.6207	102.203
	20	91.0965	100.471	112.508	91.0364	107.462	110.468	82.8783	92.8779	94.8143	114.695
	40	98.42	100.855	117.013	108.364	103.416	107.128	88.3844	98.6622	93.4674	99.3506
	60	88.7933	95.4512	125.978	93.9642	101.748	109.085	83.0442	96.9043	98.7896	110.035
	80	85.423	100.955	130.349	102.922	96.2833	109.706	103.983	91.8309	98.0895	92.8901
	100	84.9675	98.0445	133.39	101.83	102.712	111.564	100.091	104.631	108.146	108.79
	120	97.4707	106.062	138.328	94.3938	101.669	114.888	109.534	93.5597	105.304	108.362
	140	98.1078	108.468	136.898	96.213	106.282	109.931	90.5944	100.543	98.2081	116.389
	160	99.965	107.751	124.779	91.0046	106.009	111.219	93.0759	100.158	107.968	113.122
	180	97.3783	103.932	130.957	96.0539	101.431	107.379	92.5102	98.9562	96.4815	115.606
	200	97.0375	109.423	126.08	88.167	100.408	110.844	84.251	100.666	95.2533	100.937
	220	91.7973	109.696	123.878	104.408	99.5916	106.022	102.24	95.2821	107.577	110.779
	240	97.0852	108.735	119.136	94.9984	100.004	109.837	91.3562	94.4613	95.3423	112.198
	260	91.4309	112.461	118.089	85.8173	101.275	112.827	105.302	94.6714	98.9973	108.054
	280	95.381	115.538	117.142	97.0828	102.642	107.488	89.7119	100.999	101.549	114.494
	300	80.8932	105.314	128.755	91.9805	101.571	105.511	79.1145	91.8988	97.4605	118.183
	320	89.8955	111.379	116.641	80.715	105.347	104.545	108.048	94.652	96.707	111.669
	340	94.4158	103.681	127.032	79.4951	102.305	113.077	106.404	94.7101	92.8326	97.2484
Figure 4B - source data
	WT data
	Timepoint	Trace 1	Trace 2	Trace 3	Trace 4	Trace 5	Trace 6	Trace 7	Trace 8	Trace 9	Trace 10	Trace 11	Trace 12	Trace 13	Trace 14	Trace 15
	-20	100	100	100	100	100	100	100	100	100	100	100	100	100	100	100
photobleach->	0	0	0	0	0	0	0	0	0	0	0	0	0	0	0	0
	20	14.3311	10.4226	26.203	17.3245	9.29436	17.5339	-5.22013	26.5839	-0.98515	11.6766	16.2958	8.78868	5.5201	8.28033	38.9072
	40	23.3597	19.518	21.453	30.2415	16.1366	30.515	0.86478	53.2985	13.8362	20.9045	34.9817	18.7843	1.87943	28.4455	38.2087
	60	35.4103	19.3294	38.2024	35.0724	18.1979	26.0691	11.5409	46.7342	35.8183	18.0356	33.663	25.0823	4.90544	29.9074	51.1298
	80	29.0922	34.1181	41.3381	35.6334	19.622	39.6116	13.3333	51.9269	54.6537	23.4993	36.3476	28.7031	8.39244	39.0805	36.0723
	100	40.0523	41.9909	27.1189	40.938	21.6779	35.041	37.2013	69.7257	58.7561	30.4248	41.2693	31.0402	9.05437	46.3006	39.1331
	120	41.5228	38.7007	35.9205	38.6636	19.7987	32.7691	29.3082	36.6101	52.8452	37.1128	35.3585	38.5561	4.90544	49.336	27.7321
	140	46.0403	43.0458	28.516	44.0454	24.917	41.9993	31.6824	86.806	67.5342	29.9954	40.8925	34.0246	6.73759	52.8959	43.5703
	160	42.0338	39.8114	38.8078	46.7632	26.9568	44.7078	39.4969	59.1117	66.6078	40.9959	43.5064	38.4025	10.8865	47.9634	48.8907
	180	43.4357	41.3832	52.7321	45.7621	27.5297	37.696	27.8459	60.418	78.8414	37.2956	50.2178	38.567	3.12057	51.9585	56.7584
	200	38.6504	45.9728	56.2092	45.3489	32.6587	44.191	50.5189	104.278	79.65	49.3924	45.6965	38.8194	13.1678	48.1866	53.7798
	220	44.009	38.8543	41.3381	49.3332	33.3012	36.912	42.8774	88.7328	79.0913	50.1325	61.7921	43.9873	9.77541	51.6237	40.1808
	240	39.6286	47.7262	44.0081	49.2693	35.1751	39.665	50.1101	105.225	69.7103	50.1325	53.1732	44.1848	16.9622	44.5598	46.8159
	260	47.4111	52.5952	37.5349	55.1718	37.3702	50.3297	47.4528	126.976	80.2382	51.9963	45.7435	35.3303	15.331	46.1444	45.3369
	280	46.7319	51.7988	41.1208	56.398	37.0703	67.4269	30.5189	97.8772	79.4883	53.1202	51.1362	32.5872	9.26714	47.5617	30.608
	300	46.0091	57.3524	44.1012	58.4809	38.0448	49.902	56.4308	90.4311	75.3566	62.9146	44.4013	51.0862	15.1182	49.0459	45.7477
	320	44.4202	62.6685	52.4837	56.5358	39.2066	50.0267	53.2862	76.0287	77.3416	63.0425	51.2069	51.9421	7.17494	50.5635	47.7814
	340	48.2958	50.7649	34.8029	62.314	39.7848	45.866	53.4434	80.9928	75.4889	57.0123	49.2523	56.1554	23.5934	44.9057	38.0444
	S428A data
	Timepoint	Trace 1	Trace 2	Trace 3	Trace 4	Trace 5	Trace 6	Trace 7	Trace 8	Trace 9	Trace 10	Trace 11	Trace 12	Trace 13	Trace 14	Trace 15	Trace 16	Trace 17
	-20	100	100	100	100	100	100	100	100	100	100	100	100	100	100	100	100	100
photobleach->	0	0	0	0	0	0	0	0	0	0	0	0	0	0	0	0	0	0
	20	27.4912	-4.34291	50	31.4297	21.4658	9.05325	39.1414	8.9635	17.3286	18.7952	25.7067	3.07942	36.3844	25.8599	46.2674	46.3855	14.1991
	40	70.1758	19.9502	67.4869	33.3399	28.621	35.6608	24.596	13.8303	24.9133	26.5989	55.2028	23.7626	40.9611	40	54.7027	56.9359	48.1556
	60	47.9484	46.0529	91.3124	41.926	42.2908	31.7357	53.6364	24.9962	27.1731	22.4917	49.9795	35.7063	34.7635	86.465	71.3201	74.3732	86.4578
	80	58.8511	55.078	82.1402	51.2407	27.8067	37.574	49.3434	25.6122	32.5652	31.0581	57.1282	28.6498	39.4355	89.7452	37.3049	74.3732	72.8145
	100	83.1653	42.9767	104.81	70.1851	49.5928	17.8501	58.4596	32.7584	25.316	43.5361	54.3015	33.8611	55.6064	84.3312	13.0957	91.1592	63.1127
	120	74.1266	68.7627	121.178	55.9472	40.9825	42.1499	46.3384	28.4306	29.444	42.7929	82.7939	50.7044	45.4233	83.9172	30.5145	86.7958	63.0116
	140	81.1254	47.7041	87.7703	61.9535	37.4983	43.0177	38.1566	36.5624	22.441	48.7776	67.3904	46.3783	57.8566	104.045	32.1594	99.5116	79.0551
	160	90.8792	60.4162	87.6212	58.6254	57.7226	38.0276	59.6212	47.9901	28.6945	45.3354	36.3785	49.7195	42.296	101.465	32.4757	87.8867	82.6428
	180	73.7632	72.4949	86.0179	76.4474	68.4955	49.2111	46.2879	51.8096	31.894	39.292	74.068	53.8586	47.2921	113.248	34.2471	99.8372	98.6609
	200	92.5205	73.4675	108.315	83.7338	54.0382	31.8343	54.6212	58.1703	39.2773	26.6967	90.1885	53.8586	67.2387	76.6242	67.8828	92.185	79.5857
	220	97.8898	89.9796	94.5563	70.4214	58.0697	42.5641	42.0707	56.661	39.2326	26.7162	90.4138	45.8048	53.5088	95.1592	22.6487	98.6649	64.4517
	240	90.6682	71.5223	106.413	79.5392	60.4459	35.0099	50.505	46.0804	39.4899	32.5445	87.7304	49.8442	47.6735	63.121	50.0211	91.7942	85.3714
	260	88.6049	68.7627	80.9098	73.0603	54.9593	31.7949	48.1061	56.3684	42.5215	34.5198	67.6362	59.9053	40.4081	87.1338	57.2122	108.124	76.3264
	280	90.3165	74.9152	109.806	80.9374	54.986	31.2821	49.6212	56.3376	38.9977	38.5879	87.6075	44.6827	57.0175	78.5032	82.8132	96.1576	70.2122
	300	80.9261	80.2533	121.737	65.8724	54.1717	27.9487	47.7778	68.3197	45.6203	26.5011	86.9521	46.9767	56.1403	56.6561	56.9169	109.72	87.1652
	320	96.6002	66.9532	91.126	45.7464	62.0077	27.9487	67.7273	67.3957	41.056	43.497	84.5965	53.5594	63.4439	27.4522	84.4369	110.794	64.1486
	340	104.044	78.9188	79.5302	51.0437	64.2104	48.5207	53.8889	61.9128	53.0037	31.0581	94.49	65.8397	53.6041	84.3949	66.7018	126.213	52.4002
	S1116A data
	Timepoint	Trace 1	Trace 2	Trace 3	Trace 4	Trace 5	Trace 6	Trace 7	Trace 8	Trace 9	Trace 10	Trace 11	Trace 12	Trace 13	Trace 14	Trace 15	Trace 16	Trace 17	Trace 18	Trace 19	Trace 20	Trace 21	Trace 22
	-20	100	100	100	100	100	100	100	100	100	100	100	100	100	100	100	100	100	100	100	100	100	100
photobleach->	0	0	0	0	0	0	0	0	0	0	0	0	0	0	0	0	0	0	0	0	0	0	0
	20	20.0761	5.56193	18.7709	13.5701	14.1661	27.8694	4.70343	-4.03856	-21.3997	24.2741	16.4004	43.1112	4.7384	19.2478	17.594	23.593	23.0009	31.0784	22.5929	16.1068	47.6107	19.5534
	40	24.2911	20.075	17.1106	34.0958	38.8273	40.8915	16.4313	22.2038	7.97443	31.4452	34.7017	49.7524	15.079	35.0161	32.1829	51.1641	27.6383	45.0525	34.3328	32.9377	35.0692	40.5093
	60	46.2319	19.5165	8.12786	33.9803	45.4669	59.6116	37.3818	42.0974	17.6985	43.6428	26.8352	60.6709	25.6046	47.0032	58.9309	57.4958	42.7127	72.5363	39.8015	29.1039	54.6128	44.1585
	80	46.8995	35.0547	28.113	34.8931	41.562	50.6377	23.2101	46.7509	5.85464	44.0717	40.6067	51.5083	33.8475	41.7739	46.9206	66.8928	51.8596	65.9935	61.8454	42.2077	46.8695	51.9608
	100	42.5301	33.0044	33.6513	35.2615	60.2673	37.4049	33.2064	43.4768	32.3015	53.8825	43.094	47.5912	37.5617	43.5036	50.6893	73.9615	55.974	76.5145	50.6546	31.0267	58.9233	49.1558
	120	42.9218	39.9204	44.1209	43.4321	51.4782	58.2076	34.545	29.7989	43.4724	34.2719	49.7472	68.7528	32.885	53.1175	55.1324	83.4422	52.1037	76.3328	61.9088	43.8694	31.9875	50.3132
	140	53.5088	39.7445	34.2585	45.7965	56.5657	49.9708	31.2784	43.1943	34.6232	45.6995	63.3367	92.9761	46.4832	53.0169	63.9195	77.0017	72.3152	70.3554	41.0051	48.1187	46.5574	49.9319
	160	45.3547	53.4313	43.7368	43.729	54.3237	56.0665	39.6291	40.934	30.821	40.4641	51.7695	82.0801	51.2957	57.0797	54.1902	78.2747	67.887	70.4362	53.8429	50.8961	41.3107	55.5964
	180	50.8275	52.8728	40.8004	51.3939	61.0926	50.3334	33.3047	54.7948	26.5141	51.0559	41.1122	71.3642	40.7947	68.6947	67.232	63.2077	82.0549	72.8998	58.0659	43.5134	29.3739	58.8099
	200	47.865	46.1174	34.4567	54.4345	52.556	60.2902	33.2801	61.6586	29.6433	53.0466	44.2872	69.4507	45.4714	67.8298	58.0185	88.6432	65.4695	99.6971	58.1926	42.3383	58.3772	60.1307
	220	57.0782	40.0122	48.061	56.5844	61.647	59.9509	23.8241	34.2197	8.14266	48.9881	53.5895	83.2508	41.9299	60.8206	57.6317	73.4673	62.6569	105.331	74.0287	49.5786	42.7736	56.3045
	240	62.9151	49.1852	34.7417	54.1706	60.8524	63.9523	45.4746	54.1466	15.3432	47.3383	57.0071	64.3629	43.6081	61.6854	44.5899	83.4087	71.9665	90.0242	87.0566	43.4303	59.5085	49.4826
	260	52.0964	45.0004	23.38	33.7549	60.1133	66.7252	47.329	62.1905	18.9435	57.8751	60.182	73.638	50.3455	65.1146	45.4329	90.5276	69.921	83.2189	87.7745	46.2433	47.8447	34.8175
	280	55.4231	47.4485	10.259	42.1565	57.5881	74.3068	38.6221	47.1165	23.9569	48.6802	46.3499	62.4494	38.4872	49.9296	63.7905	82.5628	73.9772	82.29	90.8995	43.0504	52.8184	63.1808
	300	59.2188	49.0705	15.0043	41.964	51.1949	64.3735	28.2328	44.341	38.2234	44.8966	41.2942	70.5988	47.5691	43.2924	61.8169	80.8962	60.5184	81.6236	61.8877	52.451	58.5918	62.1732
	320	57.4644	42.8735	29.8724	42.8713	70.0234	78.1912	32.8135	57.2877	20.7941	37.5385	65.9454	56.1909	46.9398	47.496	53.0398	98.0988	44.2933	81.3813	83.9316	44.1543	69.2803	61.9826
	340	71.0857	42.7741	33.1557	38.9289	71.0766	72.0487	38.9783	55.3598	32.7389	42.5869	55.45	61.2112	39.8445	38.9883	66.1212	86.3903	55.5788	87.5808	66.7441	50.3145	58.3772	53.445
	non-bleach data
	Timepoint	Trace 1	Trace 2	Trace 3	Trace 4	Trace 5	Trace 6	Trace 7	Trace 8	Trace 9	Trace 10
	-20	100	100	100	100	100	100	100	100	100	100
	0	111.238	96.0872	98.4404	100.653	109.337	112.725	94.072	102.305	99.3583	100.636
	20	106.53	100.844	96.5621	104.575	109.96	106.587	87.234	96.7967	105.31	92.9332
	40	113.753	103.979	92.0342	98.8888	117.1	109.04	91.5813	102.299	100.417	92.3662
	60	119.775	102.316	99.9832	89.2305	103.433	116.243	88.847	103.215	96.7594	103.817
	80	105.167	106.923	85.2926	94.1985	112.357	114.148	89.4628	98.0378	99.6792	96.6533
	100	117.73	109.718	96.8304	90.8047	116.857	112.927	91.9857	96.1466	110.123	104.259
	120	110.172	108.362	96.8808	96.5691	109.833	125.82	93.9847	99.5627	103.698	92.8641
	140	109.949	110.321	88.5125	102.616	107.171	104.873	80.6718	97.5118	102.663	94.8555
	160	116.429	117.514	93.2249	96.1478	91.8885	113.252	93.7595	93.7648	94.1285	106.417
	180	109.255	115.884	86.8858	94.3421	110.372	102.912	87.4133	96.0697	99.8396	103.692
	200	109.751	106.262	108.402	107.241	113.107	92.3042	92.4176	93.4456	98.0027	104.965
	220	123.083	105.954	96.6963	102.209	107.499	98.8238	95.8274	98.8534	112.914	95.6991
	240	113.394	103.015	92.1013	108.853	102.06	99.003	93.5665	99.539	98.7407	102.932
	260	125.561	101.726	85.0075	105.19	116.181	104.85	90.9195	93.7293	107.676	101.729
	280	111.87	106.15	82.5591	100.898	99.9894	93.4805	94.7934	99.273	101.749	96.7086
	300	110.011	109.04	93.9292	98.2684	106.506	96.2137	91.9581	103.824	94.8023	92.1588
	320	104.138	120.966	83.5486	100.398	104.658	85.0006	102.564	97.9019	101.684	90.7343
	340	113.183	114.633	95.3044	104.218	104.816	95.9113	103.745	93.4574	100.762	101.245
