# Supplementary material for: PLK4 promotes centriole duplication by phosphorylating STIL to link the procentriole cartwheel to the microtubule wall
Source: eLife. 2019 May 22;8:e46054. doi: 10.7554/eLife.46054 (PMC6570480; doi:10.7554/eLife.46054)
Supplement: Figure 4—source data 2. [file elife-46054-fig4-data2.xlsx]

## Sheet: Figure 4-Supplement 1
Figure 4 - Supplement 1 - source data
	WT and S428A data are contained within Figure 4-source data 1 file																			Statistical Test Used	n	Comparison	p-value
																			Figure 4-S1	Unpaired t-test	24, 16	STILWT vs STILPRP	0.0029
	PRP data
	Timepoint	Trace 1	Trace 2	Trace 3	Trace 4	Trace 5	Trace 6	Trace 7	Trace 8	Trace 9	Trace 10	Trace 11	Trace 12	Trace 13	Trace 14	Trace 15	Trace 16
	-20	100	100	100	100	100	100	100	100	100	100	100	100	100	100	100	100
photobleach->	0	0	0	0	0	0	0	0	0	0	0	0	0	0	0	0	0
	20	22.928	-9.65735	88.8795	10.9501	31.7901	-58.3957	54.9649	4.35624	15.0281	-11.3957	23.7659	14.8217	7.52779	9.63669	-26.6389	40.5196
	40	11.9851	10.7011	159.73	19.2457	21.6651	-5.89336	48.7758	64.5886	24.246	54.3776	47.9275	6.12557	17.0037	-11.26	-19.636	19.913
	60	10.6204	9.03532	117.692	0.011061	23.7258	10.0795	19.338	45.5179	30.2096	29.7002	23.7659	5.54583	12.3452	4.0067	-29.9398	32.5967
	80	-12.6055	38.2815	98.0202	19.8651	16.5545	24.2516	39.2541	42.1684	39.3593	36.4304	39.1585	18.4971	21.6517	9.97166	-7.46568	68.4613
	100	36.526	6.05166	67.5232	11.6801	23.1625	17.9841	68.5105	24.8015	42.9375	54.3975	14.8719	17.0204	24.6268	29.8763	3.11584	76.678
	120	30.6948	29.7311	96.925	48.2248	22.0635	44.7848	23.9742	23.969	21.1109	61.3063	45.0531	30.6498	34.685	17.3667	19.0807	77.8183
	140	47.2457	26.1571	113.058	56.7526	18.4916	26.9411	25.6971	23.5818	24.4675	67.7189	42.3037	35.583	15.7438	22.7905	-2.29832	90.7135
	160	19.5037	37.2799	81.508	38.425	46.4075	46.3751	46.2253	19.4966	17.1579	51.5783	30.4103	30.4529	31.5299	3.04045	-10.8283	74.1977
	180	14.4169	23.6689	131.634	35.5934	16.3621	12.1609	29.4491	33.7464	24.4164	61.1475	13.9971	31.5139	15.405	5.47539	28.1505	79.2054
	200	14.5906	34.9921	158.804	52.9587	30.5537	41.2535	32.521	44.6079	21.9629	37.1848	28.8898	40.8116	45.8126	43.5455	50.3779	72.1406
	220	46.4268	50.4059	129.992	42.8382	47.2867	5.91674	54.126	41.8006	12.8301	45.8209	28.6815	43.6775	40.8999	46.6246	45.3185	61.8549
	240	34.6154	59.6415	172.999	64.4508	48.0148	28.812	68.5899	33.7851	27.6879	83.3036	67.4026	40.21	51.784	46.9338	19.9445	59.5862
	260	46.5757	37.3643	122.873	43.4908	53.304	66.1366	60.8366	16.1665	57.4033	33.7105	67.0902	38.263	49.8994	38.3149	58.1058	68.4613
	280	40.273	70.6168	135.804	58.2126	69.1853	16.2769	80.1746	19.2449	73.0619	93.0316	65.3614	50.175	25.7597	33.5481	48.6657	55.1076
	300	-0.7196	60.3163	62.4263	61.376	83.7615	57.8578	82.2829	51.6747	33.7366	45.4437	68.7773	37.6176	59.4389	63.8109	26.315	70.0012
	320	70.1489	78.4818	104.718	41.2233	63.1405	39.3592	72.3986	35.5857	51.968	47.429	72.7348	47.9873	27.3901	25.0451	51.905	88.7975
	340	49.9752	73.4634	106.824	40.9136	63.1543	30.87	65.484	57.3475	26.1714	69.4262	45.9904	65.7624	47.3478	49.9356	38.8863	88.7975
