# Supplementary material for: PLK4 promotes centriole duplication by phosphorylating STIL to link the procentriole cartwheel to the microtubule wall
Source: eLife. 2019 May 22;8:e46054. doi: 10.7554/eLife.46054 (PMC6570480; doi:10.7554/eLife.46054)
Supplement: Figure 4—source data 3. [file elife-46054-fig4-data3.xlsx]

## Sheet: Figure 4-Supplement 2
Figure 4 - Supplement 2A - source data
																																							Statistical Test Used	n	Comparison	p-value
																																						Figure 4-S1A	Unpaired t-test	36, 22	CPAPWT vs CPAPWT + STIL siRNA	<0.0001
	WT data																																					Figure 4-S2B	Unpaired t-test	15, 22	STILWT vs STILPRP	0.006
	Timepoint	Trace 1	Trace 2	Trace 3	Trace 4	Trace 5	Trace 6	Trace 7	Trace 8	Trace 9	Trace 10	Trace 11	Trace 12	Trace 13	Trace 14	Trace 15	Trace 16	Trace 17	Trace 18	Trace 19	Trace 20	Trace 21	Trace 22
	-20	100	100	100	100	100	100	100	100	100	100	100	100	100	100	100	100	100	100	100	100	100	100
photobleach->	0	0	0	0	0	0	0	0	0	0	0	0	0	0	0	0	0	0	0	0	0	0	0
	20	36.1069	17.0521	9.64577	24.1057	19.5822	21.929	11.1929	10.993	20.3222	-1.43043	30.4234	22.7029	19.882	21.2401	29.5545	3.5575	19.3172	10.8692	-11.2724	32.1793	26.9103	47.4392
	40	70.6318	21.0506	32.8954	35.2247	34.8711	42.2557	23.9594	16.174	25.6713	11.4434	43.6271	41.96	42.4136	32.7234	38.6092	-16.2281	30.6677	35.3468	45.0265	50.541	28.6426	30.3386
	60	75.7685	14.0206	39.4312	71.9119	33.2978	39.8523	52.665	29.3922	35.1235	-3.68444	46.3397	59.4769	48.3233	48.152	52.0282	38.4259	59.9848	38.964	43.9031	77.2643	31.0868	46.7716
	80	53.2893	24.3695	34.8744	62.6432	36.0711	58.3883	74.5431	17.3696	32.9538	24.0789	45.7479	60.5211	52.2563	54.2796	62.6041	59.771	49.6358	54.6971	54.5191	86.0587	39.0128	59.9618
	100	71.7232	38.2203	29.2034	65.2511	47.4933	54.3984	64.8223	50.2159	28.1418	5.35327	55.6331	65.9407	45.1356	51.0091	69.1054	37.768	55.736	48.446	47.6016	63.6785	36.2364	45.9609
	120	68.489	38.1942	36.92	78.4317	42.1511	48.9789	90.3807	62.1388	44.9624	10.2731	50.1656	75.8552	34.6098	55.8906	87.0337	76.1696	60.6221	34.8903	52.1964	48.6553	-0.37969	81.5737
	140	86.8829	46.2172	35.8889	52.9868	66.0711	65.1901	98.8579	63.5669	44.7906	39.3802	62.3195	71.0471	24.4359	59.8663	85.7841	32.2125	67.2079	47.9192	35.6602	69.66	2.20693	69.3085
	160	79.1629	21.4426	47.1645	37.815	61.3867	56.8018	89.1371	66.3235	32.0516	-6.84872	52.0468	63.4895	24.2703	56.6626	74.3933	46.1745	62.2306	57.2959	59.3663	54.9768	4.03417	84.1679
	180	79.0928	21.1028	31.4153	78.9427	63.2267	58.0584	96.6751	67.7184	51.8582	21.1097	51.8213	61.2669	22.1279	59.1064	78.812	26.0721	42.17	28.5865	42.9437	83.9722	28.5477	61.6309
	200	95.6443	24.0429	56.8269	35.8766	62.3022	60.6975	79.6447	75.1245	55.7895	63.3073	39.2799	66.5971	31.4014	57.8419	25.3894	68.6891	48.437	66.7428	24.4383	42.4111	27.4324	79.733
	220	89.0958	8.51953	57.5752	42.8546	57.2889	60.1948	67.7411	74.7924	62.406	44.8201	56.1333	67.1639	31.6601	62.6322	35.7479	20.1511	45.5387	28.7269	52.714	59.7682	26.1272	63.3095
	240	82.9278	14.4126	57.093	32.6167	55.52	56.6447	88.9594	99.2361	56.7777	61.1617	56.7956	75.7757	27.4167	72.7964	52.3361	50.3411	52.2458	48.4284	26.3696	33.493	43.5216	70.3195
	260	79.9639	22.5402	61.5167	5.19824	65.0133	53.6758	94.0609	79.0103	72.3953	49.6316	58.9445	63.3652	47.3401	69.4103	79.5726	65.7407	50.2276	35.9965	43.8399	43.6322	38.6331	78.9795
	280	98.8986	37.8675	48.9606	-21.022	58.7022	66.4625	73.5787	81.5344	64.5542	55.0932	57.1761	43.1981	44.8458	76.5532	49.8732	70.1998	36.085	35.4522	48.6367	63.2612	49.7864	68.4025
	300	93.5716	41.0558	62.0822	33.4626	40.7822	59.0166	60.2792	79.907	66.9173	42.2844	58.0286	45.4803	40.9025	74.1641	66.4071	65.1803	47.5721	44.9517	82.2141	18.0989	54.0342	51.2351
	320	79.9539	32.6931	69.383	45.2687	52.2844	64.4989	71.3198	71.9362	55.4028	43.7364	45.9945	41.9799	46.9986	76.693	73.1438	48.0994	31.8513	52.432	69.9066	67.1716	60.2278	57.2246
	340	74.8072	39.527	53.085	48.8458	43.5911	65.787	52.7157	80.0066	55.0161	33.7451	50.9829	48.5829	42.1652	66.5349	47.5009	43.1774	32.2762	60.4741	58.4196	27.3416	39.0603	63.8627
	WT (STIL siRNA) data
	Timepoint	Trace 1	Trace 2	Trace 3	Trace 4	Trace 5	Trace 6	Trace 7	Trace 8	Trace 9	Trace 10	Trace 11	Trace 12	Trace 13	Trace 14	Trace 15	Trace 16	Trace 17	Trace 18	Trace 19	Trace 20	Trace 21	Trace 22	Trace 23	Trace 24	Trace 25	Trace 26	Trace 27	Trace 28	Trace 29	Trace 30	Trace 31	Trace 32	Trace 33	Trace 34	Trace 35	Trace 36
	-20	100	100	100	100	100	100	100	100	100	100	100	100	100	100	100	100	100	100	100	100	100	100	100	100	100	100	100	100	100	100	100	100	100	100	100	100
photobleach->	0	0	0	0	0	0	0	0	0	0	0	0	0	0	0	0	0	0	0	0	0	0	0	0	0	0	0	0	0	0	0	0	0	0	0	0	0
	20	42.1463	20.039	70.572	42.1386	40.7898	21.8698	49.7096	47.3067	29.9267	35.6193	35.3215	37.7903	39.0412	37.6053	34.3306	40.9091	44.547	30.7427	35.9014	48.7754	41.152	17.6785	38.7597	16.8536	34.5215	19.9715	48.371	18.5654	-13.3987	52.2209	31.6204	25.5717	47.4023	41.1928	40.4877	43.2218
	40	50.2276	34.5195	86.8432	47.1413	57.3077	33.0551	63.7184	64.8649	53.4661	58.2917	63.7693	54.7656	53.3427	56.7654	58.9897	79.5486	52.8707	60.0576	58.0969	58.7378	78.3618	89.9933	52.4783	67.545	52.4514	44.077	50.3416	52.995	-11.6756	60.7006	49.2216	42.4254	55.7034	94.254	69.2945	54.596
	60	54.7968	45.987	104.364	49.5839	51.7807	67.6294	68.8685	78.1412	66.2721	62.8354	66.7214	64.5631	72.7082	64.8583	59.7156	84.3917	54.2845	54.7265	64.7534	58.6176	105.453	175.45	67.7942	47.2737	59.5534	65.7448	85.0237	62.2651	30.5407	79.5482	58.1461	52.0539	61.9961	88.191	95.8076	73.403
	80	53.4797	69.039	104.682	52.7863	54.7922	64.8414	88.6852	73.3912	78.5835	76.6126	81.4602	73.8589	77.9724	51.9403	59.2644	86.7729	48.745	55.5556	57.4531	86.7468	150.92	176.251	69.4151	63.5794	78.9898	38.0898	59.0384	57.4077	76.7677	96.7587	64.8594	65.3532	52.0252	118.249	73.5351	77.4765
	100	65.5447	52.1948	107.034	71.4131	51.4471	78.3806	81.121	57.4746	74.7448	81.5407	77.8179	63.8571	66.223	52.7317	56.2825	85.9854	52.2793	52.9764	66.6085	102.179	198.051	131.221	83.7757	86.0162	68.2023	46.6144	103.206	79.1275	94.6227	96.726	70.4139	76.2928	61.7623	142.58	78.084	90.3187
	120	60.6504	65.9091	113.072	63.9768	51.4111	61.202	77.0135	69.1218	87.5697	83.0937	86.1376	58.8964	71.4372	65.6114	63.0603	70.3832	79.1835	71.5026	85.5631	94.9962	185.326	174.183	77.7465	71.1453	78.1761	49.608	71.2034	74.6309	134.433	92.7098	79.4622	87.3052	63.2747	184.625	79.1345	94.9742
	140	64.2276	75.7013	95.7203	58.6213	46.4972	58.9816	87.1877	79.1711	90.206	77.9657	82.0681	78.5966	74.5496	61.565	56.2727	79.9826	79.3278	63.6269	77.7717	93.3884	243.057	96.7311	80.8394	140.621	86.7711	52.0314	132.685	78.146	87.0172	103.187	94.3658	88.4195	70.0587	149.653	84.7725	106.494
	160	58.7154	67.3766	116.504	71.3678	51.7447	66.6277	90.1476	75.6882	91.0702	82.5402	81.3561	67.3809	64.4316	74.3681	64.9828	70.8979	71.0185	71.825	82.1148	52.6071	208.826	188.792	85.5375	108.035	86.1524	67.6408	145.56	77.349	72.5787	115.748	87.8472	93.9111	80.1393	174.519	96.7714	111.427
	180	56.5366	65.2987	130.36	66.8355	46.2988	42.1536	85.1725	81.7989	83.4304	88.8906	89.369	74.3915	60.5384	68.841	66.4541	81.0616	59.8529	73.6327	90.2008	94.7258	264.717	104.603	83.4938	71.4062	83.0991	100.713	126.668	86.2248	69.9643	143.141	83.9643	98.0481	75.1873	148.603	84.6954	117.207
	200	59.5447	69.2078	134.407	57.4	60.1839	64.4407	88.4543	100.643	87.2253	78.8345	83.3059	75.3143	65.6725	67.7049	75.9392	76.7828	63.6613	81.2896	63.8368	86.882	260.14	215.81	85.0286	81.1636	93.5167	85.4312	89.2013	89.7735	107.843	153.836	88.2982	100.947	82.6917	127.62	91.702	108.636
	220	56.0488	75.1948	141.992	73.4214	69.7863	75.7262	97.271	93.0841	87.4757	76.7202	90.2673	74.3915	67.2838	76.653	74.105	81.6818	72.764	69.407	81.0563	57.9865	261.629	166.778	82.5777	112.731	90.4566	44.077	66.7893	75.5872	123.5	152.876	86.7946	101.296	87.1762	148.9	97.3689	134.599
	240	69.5772	74.6104	111.398	78.6503	71.1207	80.4341	97.341	91.1554	98.472	80.4336	82.8733	85.2666	65.3523	69.275	74.566	85.3466	67.2389	69.4646	74.6072	93.9444	293.057	107.872	76.9008	144.456	87.0065	56.8924	68.1293	72.9362	84.1058	164.837	92.0308	93.1828	85.3967	138.28	96.8389	120.116
	260	60.2439	76.4286	85.339	71.594	71.8601	56.177	105.563	103.745	96.393	82.4633	78.4971	85.118	53.6729	64.8966	71.7607	93.5012	66.0704	88.3477	88.7385	81.5026	210.929	59.3062	80.5653	97.4172	98.2716	7.81183	93.1424	95.2601	143.107	165.459	108.084	95.3168	86.0455	112.978	111.324	131.371
	280	65.4959	79.948	86.2076	95.5491	63.0421	65.0918	95.4657	83.1658	106.287	87.0608	87.3535	84.2014	67.0636	80.7123	79.7254	91.9137	75.101	94.7611	76.2986	94.1397	206.526	134.49	71.9991	141.508	85.6076	72.8867	131.135	106.804	74.2127	179.974	105.581	94.3991	92.6196	103.329	93.909	111.559
	300	71.9837	73.1039	88.7076	81.5723	64.8724	65.6427	90.8334	90.2628	109.769	86.661	88.9692	78.8568	62.2098	68.3814	71.8882	96.9428	68.0179	72.3316	71.0388	84.9136	187.801	47.1648	77.3158	101.122	80.0592	77.0064	102.391	102.634	78.2234	158.114	99.8231	99.1697	83.9034	98.3356	103.547	132.046
	320	61.5772	68.7273	103.475	55.8712	65.9183	47.6127	105.493	87.3603	103.776	87.6067	90.5247	78.8382	73.0084	79.4358	76.8024	96.3475	74.0335	78.8025	69.2383	104.883	156.242	-7.33823	70.8715	151.083	94.8551	84.8753	106.831	109.815	148.722	155.539	102.264	90.2986	80.9217	101.367	99.9614	100.82
	340	58.2114	64.6623	127.669	69.7214	77.2067	66.9783	102.925	103.065	124.666	90.9741	90.459	86.6724	72.6681	81.3761	95.3703	101.377	78.3901	82.6137	80.0415	113.929	203.11	-6.93796	73.3537	89.5904	88.2238	89.2374	162.165	100.797	133.601	150.333	100.283	83.3867	87.1857	125.282	91.2394	129.93
	WT (Myc-STIL background) data
	Timepoint	Trace 1	Trace 2	Trace 3	Trace 4	Trace 5	Trace 6	Trace 7	Trace 8	Trace 9	Trace 10	Trace 11	Trace 12	Trace 13	Trace 14	Trace 15
	-20	100	100	100	100	100	100	100	100	100	100	100	100	100	100	100
photobleach->	0	0	0	0	0	0	0	0	0	0	0	0	0	0	0	0
	20	14.3311	10.4226	26.203	17.3245	9.29436	17.5339	-5.22013	26.5839	-0.98515	11.6766	16.2958	8.78868	5.5201	8.28033	38.9072
	40	23.3597	19.518	21.453	30.2415	16.1366	30.515	0.86478	53.2985	13.8362	20.9045	34.9817	18.7843	1.87943	28.4455	38.2087
	60	35.4103	19.3294	38.2024	35.0724	18.1979	26.0691	11.5409	46.7342	35.8183	18.0356	33.663	25.0823	4.90544	29.9074	51.1298
	80	29.0922	34.1181	41.3381	35.6334	19.622	39.6116	13.3333	51.9269	54.6537	23.4993	36.3476	28.7031	8.39244	39.0805	36.0723
	100	40.0523	41.9909	27.1189	40.938	21.6779	35.041	37.2013	69.7257	58.7561	30.4248	41.2693	31.0402	9.05437	46.3006	39.1331
	120	41.5228	38.7007	35.9205	38.6636	19.7987	32.7691	29.3082	36.6101	52.8452	37.1128	35.3585	38.5561	4.90544	49.336	27.7321
	140	46.0403	43.0458	28.516	44.0454	24.917	41.9993	31.6824	86.806	67.5342	29.9954	40.8925	34.0246	6.73759	52.8959	43.5703
	160	42.0338	39.8114	38.8078	46.7632	26.9568	44.7078	39.4969	59.1117	66.6078	40.9959	43.5064	38.4025	10.8865	47.9634	48.8907
	180	43.4357	41.3832	52.7321	45.7621	27.5297	37.696	27.8459	60.418	78.8414	37.2956	50.2178	38.567	3.12057	51.9585	56.7584
	200	38.6504	45.9728	56.2092	45.3489	32.6587	44.191	50.5189	104.278	79.65	49.3924	45.6965	38.8194	13.1678	48.1866	53.7798
	220	44.009	38.8543	41.3381	49.3332	33.3012	36.912	42.8774	88.7328	79.0913	50.1325	61.7921	43.9873	9.77541	51.6237	40.1808
	240	39.6286	47.7262	44.0081	49.2693	35.1751	39.665	50.1101	105.225	69.7103	50.1325	53.1732	44.1848	16.9622	44.5598	46.8159
	260	47.4111	52.5952	37.5349	55.1718	37.3702	50.3297	47.4528	126.976	80.2382	51.9963	45.7435	35.3303	15.331	46.1444	45.3369
	280	46.7319	51.7988	41.1208	56.398	37.0703	67.4269	30.5189	97.8772	79.4883	53.1202	51.1362	32.5872	9.26714	47.5617	30.608
	300	46.0091	57.3524	44.1012	58.4809	38.0448	49.902	56.4308	90.4311	75.3566	62.9146	44.4013	51.0862	15.1182	49.0459	45.7477
	320	44.4202	62.6685	52.4837	56.5358	39.2066	50.0267	53.2862	76.0287	77.3416	63.0425	51.2069	51.9421	7.17494	50.5635	47.7814
	340	48.2958	50.7649	34.8029	62.314	39.7848	45.866	53.4434	80.9928	75.4889	57.0123	49.2523	56.1554	23.5934	44.9057	38.0444
Figure 4 - Supplement 2B - source data
	WT and S428A data are contained in Figure 4-source data 1 file
	PRP data
	Timpoint	Trace 1	Trace 2	Trace 3	Trace 4	Trace 5	Trace 6	Trace 7	Trace 8	Trace 9	Trace 10	Trace 11	Trace 12	Trace 13	Trace 14	Trace 15	Trace 16	Trace 17	Trace 18	Trace 19	Trace 20	Trace 21	Trace 22
	-20	100	100	100	100	100	100	100	100	100	100	100	100	100	100	100	100	100	100	100	100	100	100
photobleach->	0	0	0	0	0	0	0	0	0	0	0	0	0	0	0	0	0	0	0	0	0	0	0
	20	26.8293	25	40.8224	-4.75024	11.8874	33.0514	15.6265	21.7903	21.1436	11.5468	33.9947	25.4958	26.7602	24.3703	12.1287	5.51923	15.8424	10.7998	25.8135	21.9559	11.5001	11.3126
	40	45.5285	45.7371	41.4953	6.92948	36.8874	34.4609	22.5716	44.0921	26.8615	39.4604	53.3333	65.3349	27.3409	23.0133	25.4911	13.4256	51.3872	19.9674	32.3488	24.8808	29.566	26.9905
	60	17.3635	42.8508	51.7009	12.6347	39.755	55.4792	36.1333	41.6198	41.9568	56.187	39.418	41.7936	39.8742	23.3479	36.6803	21.6816	65.0583	44.6953	45.3483	44.3371	37.3911	26.0682
	80	46.1673	48.357	46.2804	45.3722	53.1283	48.2734	37.0483	52.191	50.8259	42.8058	43.0952	52.8313	43.0922	36.4253	44.2251	30.1201	43.3856	44.4505	48.7825	48.0222	34.3498	43.8057
	100	25.3194	46.6696	28	39.5935	41.8665	56.5715	56.3116	63.0008	36.2643	38.4892	32.3809	86.3466	59.7871	41.8347	36.481	29.9073	27.7041	38.901	53.9637	49.156	37.5257	45.0046
	120	47.0964	57.238	67.2897	64.7404	55.3963	64.3235	65.5326	63.6829	24.9809	43.3453	48.4127	60.3622	61.2388	49.7258	48.2016	34.0733	60.4343	46.4635	41.4337	59.799	45.937	54.1449
	140	43.6121	73.3792	37.8318	56.7091	66.658	52.2199	63.8198	89.7869	26.9377	46.4029	64.418	73.4406	38.2289	53.2484	45.6771	30.1049	54.1616	39.5267	46.6641	51.2305	45.4538	56.1021
	160	50.5226	39.4982	61.9439	42.7277	64.9896	64.0063	61.6377	81.1765	39.1868	68.4892	38.7831	85.1681	51.6332	50.6739	58.2329	51.5737	86.0072	60.3645	45.1409	65.7776	44.1312	58.838
	180	43.3798	63.6545	53.6075	49.4613	61.9917	50.9514	62.9047	95.4305	36.7217	54.8921	77.037	61.2532	48.633	63.8628	59.4951	36.7037	76.4777	61.5615	48.4058	57.557	46.5626	56.184
	200	57.4332	54.6403	61.9813	49.4123	82.5078	55.9549	39.3477	108.133	35.1461	64.2446	57.4868	59.7585	67.0215	61.6507	56.8568	33.1002	46.8436	55.3319	56.9557	47.5325	46.4597	58.6843
	220	48.8966	71.2034	71.2897	55.4848	73.9051	77.2551	59.4322	101.159	35.6544	49.9281	63.0423	88.9624	46.8909	65.1919	49.3499	54.128	89.9477	85.3101	43.9834	57.6472	55.2511	62.1785
	240	62.4274	50.9325	54.6168	62.9285	91.8405	70.1903	58.1886	72.4808	26.277	40.1799	44.127	83.731	65.3278	58.6951	53.2694	29.4815	117.008	89.0098	48.3894	47.5841	50.1346	61.8301
	260	23.8676	68.1616	68.0374	58.7659	63.1126	73.0268	52.1821	91.9182	32.7065	76.8345	50.7407	89.5085	53.0123	65.2756	49.7011	45.796	89.8271	101.306	48.7279	63.5614	60.0586	64.7607
	280	46.8641	48.3348	66.8037	57.8844	79.8749	72.8858	54.5519	82.8303	29.352	45.1439	72.1429	77.8385	81.9018	50.7947	50.1281	55.9374	99.5175	67.6551	53.5488	55.9851	58.6092	65.0374
	300	26.4228	40.5862	64.1121	53.9667	72.0542	79.0169	53.7306	84.5183	48.6404	82.0504	37.2222	104.484	69.7314	64.2811	53.0132	54.4777	61.6405	98.8847	56.8629	61.2034	54.7679	61.9941
	320	36.5854	48.9565	73.4953	63.1244	97.4192	92.2833	58.1417	102.302	21.9822	79.964	53.836	70.0201	66.1989	53.3507	64.544	56.1046	84.2782	78.0468	56.1968	59.2321	55.9243	63.152
	340	34.5528	64.7202	66.0187	57.3212	102.138	88.9887	78.0619	85.2856	39.136	93.2734	58.0159	82.8111	59.4483	74.8954	66.3377	49.3234	98.07	66.1317	54.1767	55.1733	50.5227	59.4221
