# Supplementary material for: PLK4 promotes centriole duplication by phosphorylating STIL to link the procentriole cartwheel to the microtubule wall
Source: eLife. 2019 May 22;8:e46054. doi: 10.7554/eLife.46054 (PMC6570480; doi:10.7554/eLife.46054)
Supplement: Figure 5—source data 1. [file elife-46054-fig5-data1.xlsx]

## Sheet: Figure 5
Figure 5C - source data
			Percent of mitotic cells containing:
			0 centrioles			1 centriole			2 centrioles			3 centrioles			4 centrioles			5+ centrioles
	CPAP siRNA	Myc-GFP-CPAP Transgene	Trial 1	Trial 2	Trial 3	Trial 1	Trial 2	Trial 3	Trial 1	Trial 2	Trial 3	Trial 1	Trial 2	Trial 3	Trial 1	Trial 2	Trial 3	Trial 1	Trial 2	Trial 3
	-	-	0	0	3.33333	0	0	0	12.5	13.7931	13.3333	12.5	24.1379	10	71.875	62.069	70	3.125	0	3.33333						Statistical Test Used	n	Comparison	p-value
	+	-	6.66667	3.33333	6.45161	13.3333	16.6667	32.2581	70	46.6667	54.8387	3.33333	26.6667	6.45161	6.66667	6.66667	0	0	0	0					Figure 5C	Unpaired t-test	3, 3	control vs knockdown	<0.0001
	+	WT	0	3.57143	0	0	0	10	19.3548	25	13.3333	22.5806	17.8571	13.3333	58.0645	53.5714	63.3333	0	0	0						Unpaired t-test	3, 3	control vs WT addback	0.2284
	+	F1229A	6.89655	0	6.45161	6.89655	9.67742	32.2581	48.2759	41.9355	22.5806	13.7931	35.4839	22.5806	24.1379	12.9032	16.129	0	0	0						Unpaired t-test	3, 3	WT addback vs F1229A addback	0.0011
	+	E1235K	0	0	0	3.44828	10.3448	16.129	37.931	31.0345	45.1613	34.4828	20.6897	22.5806	20.6897	37.931	16.129	3.44828	0	0						Unpaired t-test	3, 3	WT addback vs E1235K addback	0.006
																									Figure 5D	One sample t-test	3	CPAPWT + STIL + Plk4KD vs. CPAPWT + STIL + Plk4WT	0.0037
																										One sample t-test	3	CPAPWT + STIL + Plk4WT vs. CPAPF1229A + STIL + Plk4WT	0.0153
Figure 5D - source data																										One sample t-test	3	CPAPWT + STIL + Plk4WT vs. CPAPE1235K + STIL + Plk4WT	0.0008
																									Figure 5E	Unpaired t-test	22, 21	CPAPWT vs CPAPE1235K	0.0145
	Flag-CPAP:	WT	WT	F1229A	F1229A	E1235K	E1235K																			Unpaired t-test	22, 19	CPAPWT vs CPAPF1229A	<0.0001
	PLK4∆24-mCherry:	KD	WT	KD	WT	KD	WT																		Figure 5F	One sample t-test	3	CPAPWT vs CPAPE1235K	0.2448
	Myc-GFP-STIL:	+	+	+	+	+	+																			One sample t-test	3	CPAPWT vs CPAPF1229A	0.4124
	Trial 1	35.1594	100	4.6516	11.1438	4.5685	28.7288																		Figure 5G	One sample t-test	3	CPAPWT vs CPAPE1235K	0.7476
	Trial 2	47.1048	100	1.06228	6.58035	17.9252	34.4093																			One sample t-test	3	CPAPWT vs CPAPF1229A	0.3719
	Trial 3	37.5703	100	25.9059	39.0532	15.3046	28.4933
Figure 5E - source data
	WT data
	Timepoint	Trace 1	Trace 2	Trace 3	Trace 4	Trace 5	Trace 6	Trace 7	Trace 8	Trace 9	Trace 10	Trace 11	Trace 12	Trace 13	Trace 14	Trace 15	Trace 16	Trace 17	Trace 18	Trace 19	Trace 20	Trace 21	Trace 22
	-20	100	100	100	100	100	100	100	100	100	100	100	100	100	100	100	100	100	100	100	100	100	100
photobleach->	0	0	0	0	0	0	0	0	0	0	0	0	0	0	0	0	0	0	0	0	0	0	0
	20	36.1069	17.0521	9.64577	24.1057	19.5822	21.929	11.1929	10.993	20.3222	-1.43043	30.4234	22.7029	19.882	21.2401	29.5545	3.5575	19.3172	10.8692	-11.2724	32.1793	26.9103	47.4392
	40	70.6318	21.0506	32.8954	35.2247	34.8711	42.2557	23.9594	16.174	25.6713	11.4434	43.6271	41.96	42.4136	32.7234	38.6092	-16.2281	30.6677	35.3468	45.0265	50.541	28.6426	30.3386
	60	75.7685	14.0206	39.4312	71.9119	33.2978	39.8523	52.665	29.3922	35.1235	-3.68444	46.3397	59.4769	48.3233	48.152	52.0282	38.4259	59.9848	38.964	43.9031	77.2643	31.0868	46.7716
	80	53.2893	24.3695	34.8744	62.6432	36.0711	58.3883	74.5431	17.3696	32.9538	24.0789	45.7479	60.5211	52.2563	54.2796	62.6041	59.771	49.6358	54.6971	54.5191	86.0587	39.0128	59.9618
	100	71.7232	38.2203	29.2034	65.2511	47.4933	54.3984	64.8223	50.2159	28.1418	5.35327	55.6331	65.9407	45.1356	51.0091	69.1054	37.768	55.736	48.446	47.6016	63.6785	36.2364	45.9609
	120	68.489	38.1942	36.92	78.4317	42.1511	48.9789	90.3807	62.1388	44.9624	10.2731	50.1656	75.8552	34.6098	55.8906	87.0337	76.1696	60.6221	34.8903	52.1964	48.6553	-0.37969	81.5737
	140	86.8829	46.2172	35.8889	52.9868	66.0711	65.1901	98.8579	63.5669	44.7906	39.3802	62.3195	71.0471	24.4359	59.8663	85.7841	32.2125	67.2079	47.9192	35.6602	69.66	2.20693	69.3085
	160	79.1629	21.4426	47.1645	37.815	61.3867	56.8018	89.1371	66.3235	32.0516	-6.84872	52.0468	63.4895	24.2703	56.6626	74.3933	46.1745	62.2306	57.2959	59.3663	54.9768	4.03417	84.1679
	180	79.0928	21.1028	31.4153	78.9427	63.2267	58.0584	96.6751	67.7184	51.8582	21.1097	51.8213	61.2669	22.1279	59.1064	78.812	26.0721	42.17	28.5865	42.9437	83.9722	28.5477	61.6309
	200	95.6443	24.0429	56.8269	35.8766	62.3022	60.6975	79.6447	75.1245	55.7895	63.3073	39.2799	66.5971	31.4014	57.8419	25.3894	68.6891	48.437	66.7428	24.4383	42.4111	27.4324	79.733
	220	89.0958	8.51953	57.5752	42.8546	57.2889	60.1948	67.7411	74.7924	62.406	44.8201	56.1333	67.1639	31.6601	62.6322	35.7479	20.1511	45.5387	28.7269	52.714	59.7682	26.1272	63.3095
	240	82.9278	14.4126	57.093	32.6167	55.52	56.6447	88.9594	99.2361	56.7777	61.1617	56.7956	75.7757	27.4167	72.7964	52.3361	50.3411	52.2458	48.4284	26.3696	33.493	43.5216	70.3195
	260	79.9639	22.5402	61.5167	5.19824	65.0133	53.6758	94.0609	79.0103	72.3953	49.6316	58.9445	63.3652	47.3401	69.4103	79.5726	65.7407	50.2276	35.9965	43.8399	43.6322	38.6331	78.9795
	280	98.8986	37.8675	48.9606	-21.022	58.7022	66.4625	73.5787	81.5344	64.5542	55.0932	57.1761	43.1981	44.8458	76.5532	49.8732	70.1998	36.085	35.4522	48.6367	63.2612	49.7864	68.4025
	300	93.5716	41.0558	62.0822	33.4626	40.7822	59.0166	60.2792	79.907	66.9173	42.2844	58.0286	45.4803	40.9025	74.1641	66.4071	65.1803	47.5721	44.9517	82.2141	18.0989	54.0342	51.2351
	320	79.9539	32.6931	69.383	45.2687	52.2844	64.4989	71.3198	71.9362	55.4028	43.7364	45.9945	41.9799	46.9986	76.693	73.1438	48.0994	31.8513	52.432	69.9066	67.1716	60.2278	57.2246
	340	74.8072	39.527	53.085	48.8458	43.5911	65.787	52.7157	80.0066	55.0161	33.7451	50.9829	48.5829	42.1652	66.5349	47.5009	43.1774	32.2762	60.4741	58.4196	27.3416	39.0603	63.8627
	F1229A data
	Timepoint	Trace 1	Trace 2	Trace 3	Trace 4	Trace 5	Trace 6	Trace 7	Trace 8	Trace 9	Trace 10	Trace 11	Trace 12	Trace 13	Trace 14	Trace 15	Trace 16	Trace 17	Trace 18	Trace 19
	-20	100	100	100	100	100	100	100	100	100	100	100	100	100	100	100	100	100	100	100
photobleach->	0	0	0	0	0	0	0	0	0	0	0	0	0	0	0	0	0	0	0	0
	20	16.8953	40.8085	24.218	72.0712	38.3129	43.6194	31.9253	-12.3888	24.1851	13.2923	38.6836	27.5898	22.2772	21.6042	4.97522	23.5165	42.3465	41.0409	36.0533
	40	56.0434	54.7053	45.9207	50.2923	47.1181	60.4941	59.9052	66.9989	26.0186	32.1641	73.2141	42.4198	54.5058	39.413	11.666	78.9325	81.352	77.5007	47.5314
	60	70.652	63.4558	51.5318	46.7599	29.8773	60.0736	82.9639	44.749	54.3364	48.3077	48.3087	50.9344	62.393	53.1192	36.199	103.485	101.593	107.915	61.4383
	80	63.6744	57.725	42.9754	29.0216	44.648	53.8836	80.2454	48.2734	67.404	75.7333	71.6207	58.4663	68.5434	63.8599	30.7663	84.3642	55.0505	132.339	66.7249
	100	79.7596	74.3871	44.0396	54.4854	65.9049	76.3175	69.7895	66.2869	57.5087	73.3949	40.7993	53.778	71.1025	48.8015	26.0389	85.3689	93.007	102.304	74.742
	120	63.4392	59.9816	44.663	69.3774	74.1556	71.376	108.811	53.115	22.4389	49.8462	61.9956	60.319	71.7402	64.075	68.8334	81.3501	89.122	75.0881	61.2081
	140	66.1309	67.3251	61.0663	71.0292	75.8696	64.174	88.0385	76.0769	69.383	63.8974	78.4119	62.1234	78.5451	60.6792	59.188	101.225	73.5043	90.1057	73.9959
	160	80.4782	65.1009	38.364	55.756	86.372	50.9922	106.204	92.9868	78.9581	68.8821	82.8784	74.2629	60.8995	54.4868	77.7926	103.203	81.4685	110.301	79.9254
	180	60.9957	56.5723	46.4151	52.2745	96.9585	79.4322	95.5249	70.1317	77.7939	86.5846	72.4174	77.6462	60.631	67.394	35.1506	91.1146	91.9192	78.5579	77.7981
	200	70.2339	59.3106	57.8631	75.2986	93.2784	84.7417	111.251	84.3005	75.9604	76.4923	79.5743	78.6531	60.094	65.2735	69.5006	105.275	44.5221	67.1456	81.9178
	220	61.1656	57.7629	50.4246	66.6836	83.9523	71.836	112.268	64.6137	46.5658	74.7692	88.7293	65.7242	68.6189	62.8765	66.4506	82.5746	55.7887	76.0911	90.5302
	240	75.5782	67.0274	50.4998	97.967	101.865	53.9624	101.227	50.5162	10.5064	71.4667	83.662	64.3789	68.8622	59.3884	91.8223	82.3862	60.3341	48.6582	72.5274
	260	47.5369	63.8346	63.7966	86.6836	92.4887	77.4609	117.329	65.3613	81.752	63.241	62.74	65.7967	82.5138	48.2483	66.7938	103.611	111.81	66.5221	82.3464
	280	49.1833	63.748	71.8263	82.7954	87.9684	66.4608	111.069	67.9245	71.7113	71.8154	64.2288	73.836	79.3422	29.5329	48.7419	105.212	76.0684	50.6912	74.1467
	300	74.0233	68.0827	68.0748	43.6849	107.562	72.7034	106.845	54.539	91.298	95.6308	82.8915	58.5629	82.388	61.6933	58.4826	104.05	77.5835	34.8875	95.9835
	320	77.3161	69.0784	79.9205	59.0851	103.68	78.7883	103.22	70.2385	51.0477	92.6769	75.1208	77.1709	62.1161	35.3411	43.4045	95.573	69.1919	58.8506	84.442
	340	87.6258	71.5028	81.2641	60.4066	81.7342	71.7571	85.6545	81.5949	103.318	81.6	84.1844	67.3997	54.0695	47.5722	35.589	96.2009	81.6239	76.7146	92.5703
	E1235K data
	Timepoint	Trace 1	Trace 2	Trace 3	Trace 4	Trace 5	Trace 6	Trace 7	Trace 8	Trace 9	Trace 10	Trace 11	Trace 12	Trace 13	Trace 14	Trace 15	Trace 16	Trace 17
	-20	100	100	100	100	100	100	100	100	100	100	100	100	100	100	100	100	100
photobleach->	0	0	0	0	0	0	0	0	0	0	0	0	0	0	0	0	0	0
	20	13.6803	32.7218	18.2733	-33.8167	21.8234	21.8234	7.81464	34.7279	41.8456	13.7726	16.0722	32.6103	29.7486	-12.5728	28.2994	13.2025	34.302
	40	37.0787	32.7005	56.4683	36.4269	34.9819	34.9819	43.8443	46.8417	49.1478	49.0385	45.9713	37.8399	57.1373	-0.61331	53.9631	-14.1227	53.8777
	60	40.962	39.3985	59.4021	38.1091	39.3595	39.3595	64.7381	37.6401	65.0132	80.8258	62.4698	46.0541	62.6306	12.8181	49.3267	16.4908	64.3163
	80	61.0093	30.1621	37.7759	57.4246	46.0744	46.0744	54.1541	54.635	60.6623	50.3959	63.0524	49.804	61.8569	12.7262	51.9815	34.6748	61.5529
	100	63.1382	24.616	60.7572	25.232	41.7097	41.7097	63.9704	56.9456	71.193	65.0452	59.7698	49.0957	79.1489	11.5302	54.7711	29.2515	66.1883
	120	65.208	26.5785	63.7329	63.1671	52.2856	52.2856	61.3107	49.289	63.9601	52.7715	56.6292	69.5713	93.4236	15.0261	64.8519	37.1411	70.1729
	140	56.7514	28.477	69.6703	14.9652	52.4406	52.4406	49.5202	66.8581	62.9763	68.2692	57.2261	71.9805	89.1683	37.7798	65.3905	42.6135	72.4193
	160	73.8616	54.0529	48.2397	43.1555	66.3611	66.3611	45.7636	57.889	59.6508	65.4977	45.616	68.2939	114.971	55.7191	71.4121	48.6135	70.4314
	180	68.1057	64.7611	54.8896	31.9606	67.9236	67.9236	61.7768	43.8474	76.8879	90.8937	61.7024	65.2839	80.8898	40.2637	45.075	65.1534	81.0661
	200	67.7706	54.2022	49.9441	76.0441	72.314	72.314	41.87	62.2505	69.2393	61.595	78.5562	64.2469	109.13	40.969	44.9596	57.6196	70.6276
	220	63.4339	37.82	50.5868	75.6381	74.8321	74.8321	54.3186	66.2975	68.9622	39.7907	68.9356	77.7412	131.876	42.717	36.264	77.362	81.2979
	240	71.5356	43.4514	38.5722	77.6682	72.2495	72.2495	36.057	59.1332	79.964	70.8145	90.1805	77.0204	121.702	44.6489	61.312	67.2761	75.7176
	260	79.6964	43.5367	41.4362	67.2274	73.6958	73.6958	65.0123	57.0276	81.4327	78.8179	96.5042	78.304	99.0329	46.0902	61.8315	70.4417	82.5816
	280	73.1914	45.5631	46.4096	59.1647	73.9799	73.9799	70.1398	69.5926	89.7603	63.3484	65.3403	83.1226	77.795	17.51	89.9	65.1166	79.7023
	300	84.4471	43.5154	38.4465	7.36659	76.8982	76.8982	73.5399	71.5751	73.9227	97.5396	67.2161	91.0838	101.47	35.8479	67.526	85.1043	77.0369
	320	70.8259	60.6015	40.5281	21.1137	76.6141	76.6141	61.8042	78.9718	81.3912	92.2511	73.1135	70.9435	78.8781	26.2189	78.6264	64.9571	69.9412
	340	56.8106	23.5495	44.6773	10.6729	65.8187	65.8187	59.4461	68.7585	74.6986	98.2749	98.11	81.6681	88.1238	61.6375	94.9211	66.3558	78.1868
	non-bleach data
	Timepoint	Trace 1	Trace 2	Trace 3	Trace 4	Trace 5	Trace 6	Trace 7	Trace 8	Trace 9
	-20	100	100	100	100	100	100	100	100	100
	0	106.762	104.438	106.447	95.2204	108.451	105.841	98.9048	99.576	104.843
	20	106.713	103.996	105.603	90.9843	97.9128	96.6312	99.6487	104.516	100.195
	40	106.887	103.038	93.4302	92.6763	91.7362	101.28	94.9167	101.181	102.826
	60	108.609	104.82	92.7362	91.8488	88.7374	94.273	100.2	110.223	101.662
	80	109.222	106.728	92.4898	86.2048	88.5756	102.055	98.7498	105.083	102.682
	100	113.067	108.081	79.7977	93.5902	84.8526	96.7457	98.0576	102.101	102.631
	120	109.644	108.06	82.995	92.2934	87.5958	98.9018	96.9073	101.582	101.908
	140	107.246	106.963	81.004	99.4936	87.2806	93.3769	97.0037	101.296	101.279
	160	109.737	109.816	73.4483	99.9382	77.3556	95.9776	96.7179	108.065	91.4998
	180	108.494	114.489	82.8783	96.3073	79.9029	101.435	97.4859	99.5236	92.9382
	200	108.569	110.745	93.5988	93.8372	87.6981	94.1046	96.5836	104.888	89.4615
	220	111.238	114.909	103.269	96.0232	85.9261	103.463	99.8485	100.495	93.9357
	240	104.658	120.07	108.042	82.8578	84.0944	97.433	96.1944	109.48	93.8778
	260	109.235	112.976	102.289	101.531	79.281	101.132	99.3525	106.126	90.7626
	280	104.098	124.28	109.171	98.3698	85.3467	100.728	93.2498	107.146	90.3939
	300	103.25	109.611	113.477	86.7605	75.6858	104.703	94.1865	112.343	97.4485
	320	104.8	102.614	109.748	86.8223	78.0201	95.1893	90.7322	109.399	91.4059
	340	103.379	102.286	106.875	80.746	84.5204	91.0457	87.3571	113.424	88.7026
Figure 5G - source data
		WT	F1229A	E1235K
	Trial 1	100	114.293	89.5761
	Trial 2	100	104.894	109.742
	Trial 3	100	97.477	107.789
