# Supplementary material for: PLK4 promotes centriole duplication by phosphorylating STIL to link the procentriole cartwheel to the microtubule wall
Source: eLife. 2019 May 22;8:e46054. doi: 10.7554/eLife.46054 (PMC6570480; doi:10.7554/eLife.46054)
Supplement: Figure 5—source data 2. [file elife-46054-fig5-data2.xlsx]

## Sheet: Figure 5-Supplement 1
Figure 5 - Supplement 1A - source data
												Statistical Test Used	n	Comparison	p-value
											Figure 5-S1A	One sample t-test	3	control vs knockdown	0.0017
	STIL siRNA:	-	+								Figure 5-S1B	One sample t-test	3	control vs knockdown	0.0492
	Trial 1	100	24.6229								Figure 5-S1D	One sample t-test	6	STILWT vs STILS428A	0.3546
	Trial 2	100	18.5079									One sample t-test	6	STILWT vs STILS1116A	0.1042
	Trial 3	100	12.8866									One sample t-test	6	STILWT vs STILPRP	0.8011
												One sample t-test	6	STILWT vs STILPRP/28A	0.1524
												One sample t-test	3	STILWT vs STIL28A/16A	0.4024
												One sample t-test	3	STILWT vs STILPRP/16A	0.8232
Figure 5 - Supplement 1B - source data												One sample t-test	3	STILWT vs STILPRP/28A/16A	0.6769
	STIL siRNA:	-	+
	Trial 1	100	73.8719
	Trial 2	100	59.4964
	Trial 3	100	81.7581
Figure 5 - Supplement 1D - source data
		WT	S428A	S1116A	PRP_AAA	PRP/28A	28A/16A	PRP/16A	PRP/28A/16A
	Trial 1	100	97.5947	100.384	94.2653	56.006
	Trial 2	100	112.059	115.329	112.143	103.563
	Trial 3	100	96.8844	64.9967	59.5955	71.0367
	Trial 4	100	79.945	60.7362	70.5569	47.9469	97.1611	105.549	103.854
	Trial 5	100	92.088	85.3513	134.133	71.6108	101.708	105.606	118.794
	Trial 6	100	95.6186	64.1843	111.1	126.403	73.9816	83.148	89.572
