# Supplementary material for: PLK4 promotes centriole duplication by phosphorylating STIL to link the procentriole cartwheel to the microtubule wall
Source: eLife. 2019 May 22;8:e46054. doi: 10.7554/eLife.46054 (PMC6570480; doi:10.7554/eLife.46054)
Supplement: Figure 6—source data 1. [file elife-46054-fig6-data1.xlsx]

## Sheet: Figure 6B
Figure 6B - source data
			Percent of interphase cells containing:
			0 Centrin foci			1 Centrin foci			2 Centrin foci			3 Centrin foci			4 Centrin foci			5+ Centrin foci
			Trial 1	Trial 2	Trial 3	Trial 1	Trial 2	Trial 3	Trial 1	Trial 2	Trial 3	Trial 1	Trial 2	Trial 3	Trial 1	Trial 2	Trial 3	Trial 1	Trial 2	Trial 3
	parental	no washout	100	91.0256	89.4737	0	6.41026	7.01754	0	2.5641	3.50877	0	0	0	0	0	0	0	0	0
		1 day washout	50	57.8947	52.381	20	22.807	32.1429	16.6667	5.26316	15.4762	6.66667	3.50877	0	0	1.75439	0	6.66667	8.77193	0
		2 day washout	15.3846	5	6	6.15385	11.6667	20	44.6154	46.6667	50	7.69231	25	16	15.3846	10	8	10.7692	1.66667	0
		3 day washout	8.62069	0	4.7619	5.17241	12.766	14.2857	39.6552	44.6809	35.7143	20.6897	23.4043	16.6667	20.6897	19.1489	28.5714	5.17241	0	0
		3 day siRNA	97.8723	87.8788	96.9697	2.12766	6.06061	3.0303	0	6.06061	0	0	0	0	0	0	0	0	0	0
	WT	1 day washout	71.7391	25	59.5238	13.0435	20	21.4286	13.0435	27.5	0	2.17391	7.5	14.2857	0	10	4.7619	0	10	0
		2 day washout	3.7037	9.09091	20	27.7778	12.1212	17.7778	29.6296	36.3636	26.6667	16.6667	18.1818	22.2222	14.8148	15.1515	13.3333	7.40741	9.09091	0
		3 day washout	9.67742	21.4286	7.89474	12.9032	14.2857	10.5263	32.2581	28.5714	39.4737	20.9677	11.9048	21.0526	20.9677	16.6667	21.0526	3.22581	7.14286	0
	S428A	1 day washout	93.4783	85	86.3636	6.52174	15	11.3636	0	0	2.27273	0	0	0	0	0	0	0	0	0
		2 day washout	80.7692	73.6842	82.5	13.4615	18.4211	7.5	5.76923	5.26316	7.5	0	0	0	0	2.63158	0	0	0	2.5
		3 day washout	85.4545	78.9474	60.9756	7.27273	10.5263	14.6341	5.45455	10.5263	19.5122	1.81818	0	4.87805	0	0	0	0	0	0
	S1116A	1 day washout	92.8571	89.5833	90.9091	7.14286	10.4167	7.27273	0	0	1.81818	0	0	0	0	0	0	0	0	0
		2 day washout	93.4426	83.7209	90.9091	4.91803	6.97674	6.81818	1.63934	0	2.27273	0	9.30233	0	0	0	0	0	0	0
		3 day washout	91.9355	80	91.3043	8.06452	16	8.69565	0	4	0	0	0	0	0	0	0	0	0	0
	PRP	1 day washout	85.2941	93.75	95.6522	13.2353	4.16667	2.17391	1.47059	2.08333	2.17391	0	0	0	0	0	0	0	0	0
		2 day washout	82.3529	79.4872	80.7692	9.41176	15.3846	17.3077	5.88235	5.12821	1.92308	1.17647	0	0	0	0	0	1.17647	0	0			Statistical Test Used	n	Comparison	p-value
		3 day washout	62.1951	70.7317	66.6667	18.2927	21.9512	18.5185	12.1951	4.87805	7.40741	4.87805	0	5.55556	0	2.43902	1.85185	2.43902	0	0		Figure 6B	Unpaired t-test	3, 3	parental line vs. STILWT Addback	0.1579
																							Unpaired t-test	3, 3	STILWT Addback vs. STILS428A Addback	0.0018
																							Unpaired t-test	3, 3	STILWT Addback vs. STILS1116A Addback	0.0002
Figure 6C - source data																							Unpaired t-test	3, 3	STILWT Addback vs. STILPRP Addback	0.0004
			Percent of interphase cells containing:																			Figure 6C	Unpaired t-test	3, 3	parental line vs. STILWT Addback	0.4401
																							Unpaired t-test	3, 3	STILWT Addback vs. STILS428A Addback	0.2405
			0 GFP-STIL foci			1 GFP-STIL foci			2 GFP-STIL foci			3 GFP-STIL foci			4 GFP-STIL foci			5+ GFP-STIL foci					Unpaired t-test	3, 3	STILWT Addback vs. STILS1116A Addback	0.0007
			Trial 1	Trial 2	Trial 3	Trial 1	Trial 2	Trial 3	Trial 1	Trial 2	Trial 3	Trial 1	Trial 2	Trial 3	Trial 1	Trial 2	Trial 3	Trial 1	Trial 2	Trial 3			Unpaired t-test	3, 3	STILWT Addback vs. STILPRP Addback	0.0985
	parental	no washout	100	100	100	0	0	0	0	0	0	0	0	0	0	0	0	0	0	0		Figure 6F	One sample t-test	3	STILWT vs STILS428A	0.0069
																							One sample t-test	3	STILWT vs STILPRP	0.0167
		1 day washout	54.8387	64.9123	70.8333	19.3548	19.2982	22.2222	16.129	14.0351	6.94444	6.45161	0	0	0	1.75439	0	3.22581	0	0		Figure 6G	One sample t-test	3	STILWT vs STILS428A	0.0005
		2 day washout	15.873	7.01754	22.449	15.873	22.807	22.449	36.5079	52.6316	44.898	22.2222	10.5263	8.16327	3.1746	7.01754	0	6.34921	0	2.04082			One sample t-test	3	STILWT vs STILPRP	0.0005
		3 day washout	33.3333	25.5319	4.7619	10.5263	10.6383	23.8095	31.5789	46.8085	66.6667	10.5263	12.766	4.7619	8.77193	4.25532	0	5.26316	0	0		Figure 6H	One sample t-test	3	STILWT vs STILS428A	0.9851
																							One sample t-test	3	STILWT vs STILPRP	0.8174
		3 day siRNA	97.8723	96.9697	100	0	0	0	2.12766	3.0303	0	0	0	0	0	0	0	0	0	0
	WT	1 day washout	35	26.8293	47.619	12.5	19.5122	23.8095	17.5	19.5122	11.9048	10	17.0732	2.38095	12.5	14.6341	9.52381	12.5	2.43902	4.7619
		2 day washout	10.3448	18.1818	6.66667	13.7931	15.1515	15.5556	43.1034	15.1515	28.8889	15.5172	21.2121	20	6.89655	21.2121	15.5556	10.3448	9.09091	13.3333
		3 day washout	6.09756	26.1905	2.32558	14.6341	21.4286	13.9535	51.2195	35.7143	48.8372	13.4146	9.52381	16.2791	9.7561	4.7619	16.2791	4.87805	2.38095	2.32558
	S428A	1 day washout	43.8596	30	59.0909	22.807	27.5	31.8182	19.2982	22.5	9.09091	5.26316	2.5	0	0	15	0	8.77193	2.5	0
		2 day washout	39.2157	15.3846	35.8974	13.7255	38.4615	17.9487	17.6471	15.3846	23.0769	5.88235	5.12821	12.8205	3.92157	12.8205	5.12821	19.6078	12.8205	5.12821
		3 day washout	17.3077	31.5789	21.0526	25	10.5263	10.5263	9.61538	28.9474	15.7895	15.3846	10.5263	15.7895	11.5385	10.5263	21.0526	21.1538	7.89474	15.7895
	S1116A	1 day washout	91.1111	64.5833	88.8889	6.66667	29.1667	9.25926	2.22222	6.25	0	0	0	1.85185	0	0	0	0	0	0
		2 day washout	86.2069	61.9048	83.7209	10.3448	26.1905	11.6279	0	9.52381	4.65116	1.72414	2.38095	0	1.72414	0	0	0	0	0
		3 day washout	79.3103	82	82.2222	13.7931	14	15.5556	5.17241	4	2.22222	1.72414	0	0	0	0	0	0	0	0
	PRP	1 day washout	52.5424	54.1667	73.913	16.9492	25	15.2174	16.9492	16.6667	6.52174	6.77966	4.16667	4.34783	5.08475	0	0	1.69492	0	0
		2 day washout	44.4444	29.2683	46.1538	24.6914	29.2683	13.4615	12.3457	34.1463	11.5385	4.93827	2.43902	7.69231	1.23457	4.87805	15.3846	12.3457	0	5.76923
		3 day washout	41.0959	19.0476	46.1538	23.2877	26.1905	21.1538	15.0685	9.52381	17.3077	12.3288	21.4286	7.69231	1.36986	7.14286	1.92308	6.84932	16.6667	5.76923
Figure 6F - source data
		WT	S428A	PRP
	Trial 1	100	92.0653	93.1342
	Trial 2	100	89.7028	94.5466
	Trial 3	100	89.6604	95.6499
Figure 6G - source data
		WT	S428A	PRP
	Trial 1	100	10.1808	9.12991
	Trial 2	100	3.19082	4.64895
	Trial 3	100	8.34121	2.04816
Figure 6H - source data
		WT	S428A	PRP
	Trial 1	100	107.552	126.051
	Trial 2	100	107.276	109.962
	Trial 3	100	84.6939	75.6908
