# Supplementary material for: PLK4 promotes centriole duplication by phosphorylating STIL to link the procentriole cartwheel to the microtubule wall
Source: eLife journal article supplement (doi:10.7554/elife.46054), 2019-05-22
Supplement: supp [file elife-46054-supp-v1.zip]

| STIL Residue | STIL Motif | Match PLK4 Consensus Motif? | Conserved? | STIL Residue | STIL Motif | Match PLK4 Consensus Motif? | Conserved? |
|--------------|------------|-----------------------------|------------|--------------|------------|-----------------------------|------------|
| T85          | SLTAD      |                             |            | S856         | EESNI      |                             |            |
| T113         | EITPT      |                             |            | S873         | SNSSL      |                             |            |
| S117         | TASLP      |                             |            | S874         | NSSLV      |                             |            |
| S135         | LCSRE      |                             |            | S889         | FPSGQ      |                             |            |
| S142         | VHSVD      |                             |            | S895         | AESVS      |                             |            |
| S219         | NLSSN      |                             |            | S897         | SVSMC      |                             |            |
| S220         | LSSNL      |                             |            | T902         | LQTGP      |                             |            |
| S225         | NISQV      |                             |            | T905         | GPTGG      |                             |            |
| T332         | LLTSK      |                             |            | S912         | NNSET      |                             |            |
| S356         | ELSAE      |                             |            | T914         | SETSE      |                             |            |
| S359         | AESQN      |                             |            | S915         | ETSEE      |                             |            |
| S395         | HDSGV      |                             |            | S932         | QPSDN      |                             |            |
| S403         | DFSPR      |                             |            | S952         | NSSSK      |                             |            |
| S409         | IPSPH      |                             |            | S953         | SSSKE      |                             |            |
| S428         | ELSLV      |                             |            | T998         | NATLK      |                             |            |
| S475         | KHSPE      |                             |            | S1011        | IDSPT      |                             |            |
| S484         | EPSLR      |                             |            | S1032        | CISPE      |                             |            |
| S521         | RNSIK      |                             |            | S1078        | QLSQL      |                             |            |
| S526         | PSSHN      |                             |            | S1081        | QLSVT      |                             |            |
| S542         | TVSAG      |                             |            | T1083        | SVTRS      |                             |            |
| S560         | LNSRQ      |                             |            | S1094        | PFSLL      |                             |            |
| S564         | QSSLA      |                             |            | T1104        | RSTVG      |                             |            |
| S569         | PQSQP      |                             |            | S1108        | GLSLI      |                             |            |
| S577         | VFSPP      |                             |            | S1111        | LISPN      |                             |            |
| S581         | HNSGR      |                             |            | S1116        | NMSFA      |                             |            |
| T591         | IPTPP      |                             |            | S1131        | LQSSD      |                             |            |
| S610         | HHSIH      |                             |            | S1132        | QSSDN      |                             |            |
| S615         | QYSPL      |                             |            | S1135        | DNSED      |                             |            |
| S619         | LNSWQ      |                             |            | S1149        | SKSEY      |                             |            |
| T625         | ANTVG      |                             |            | S1159        | LRSIP      |                             |            |
| S628         | VGSIQ      |                             |            | S1171        | EPSKN      |                             |            |
| S711         | TESDN      |                             |            | S1181        | NCSNC      |                             |            |
| S719         | GLSPD      |                             |            | S1185        | CESVG      |                             |            |
| S753         | PCSPK      |                             |            | T1188        | VGUNA      |                             |            |
| T756         | PKTTA      |                             |            | T1192        | ADTPV      |                             |            |
| T762         | EDTVQ      |                             |            | S1225        | KPSPA      |                             |            |
| S773         | LVSVI      |                             |            | T1238        | EFTQH      |                             |            |
| S779         | QSSPG      |                             |            | T1250        | DITIF      |                             |            |
| S797         | GASLF      |                             |            | S1255        | PESLQ      |                             |            |
| S822         | ISSID      |                             |            | T1261        | SETLK      |                             |            |
| S828         | NFSVD      |                             |            | S1267        | MNSMN      |                             |            |
| S837         | VTSLP      |                             |            | T1273        | VGTFI      |                             |            |

#### Conservation Score

|  |                                             |
|--|---------------------------------------------|
|  | conserved as S or T through D. melanogaster |
|  | conserved as S or T through vertebrates     |
|  | not conserved                               |

#### Phosphorylation Motif Matching Score

|  |                                                                                              |
|--|----------------------------------------------------------------------------------------------|
|  | Contains either D or N in the -2 position OR a hydrophobic residue (V,L,M,I, or F) in the +1 |
|  | Contains neither of the above criteria                                                       |

**Total S or T in STIL: 213**

**Total S or T in mass spec coverage: 183**

match motif and phosphorylated: 33

match motif and not phosphorylated: 27

do not match motif and phosphorylated: 51

do not match motif and not phosphorylated: 72
